# Supplementary material for: The unprecedented iridal lactone and adducts of spiroiridal and isoflavonoid from Belamcanda chinensis
Source: Royal Society of Chemistry journal article supplement (doi:10.1039/c7ra00614d), 2017-01-01

## Supporting Information

# The unprecedented iridal lactone and adducts of spiroiridal and isoflavonoid from *Belamcanda chinensis*

Gang Ni, Guoru Shi, Jiayuan Li, and Dequan Yu\*

State Key Laboratory of Bioactive Substance and Function of Natural Medicines,  
Institute of Materia Medica, Chinese Academy of Medical Sciences and Peking Union  
Medical College, Beijing 100050, People's Republic of China

\* Corresponding Author:

Tel: +86-010-63165224. Fax: +86-10-63017757. E-mail: [dqyu@imm.ac.cn](mailto:dqyu@imm.ac.cn).

| Contents                                                                                        | Pages |
|-------------------------------------------------------------------------------------------------|-------|
| <b>Figure S1.</b> The UV spectrum of belamcandanin A (1) in MeOH                                | 4     |
| <b>Figure S2.</b> The IR spectrum of belamcandanin A (1)                                        | 5     |
| <b>Figure S3.</b> The HRESI spectrum of belamcandanin A (1)                                     | 6     |
| <b>Figure S4.</b> The <sup>1</sup> H NMR spectrum of belamcandanin A (1) in CDCL <sub>3</sub>   | 7     |
| <b>Figure S5.</b> The <sup>13</sup> C NMR spectrum of belamcandanin A (1) in CDCL <sub>3</sub>  | 8     |
| <b>Figure S6.</b> The DEPT spectrum of belamcandanin A (1) in CDCL <sub>3</sub>                 | 9     |
| <b>Figure S7.</b> The COSY spectrum of belamcandanin A (1) in CDCL <sub>3</sub>                 | 10    |
| <b>Figure S8.</b> The HMQC spectrum of belamcandanin A (1) in CDCL <sub>3</sub>                 | 11    |
| <b>Figure S9.</b> The HMBC spectrum of belamcandanin A (1) in CDCL <sub>3</sub>                 | 12    |
| <b>Figure S10.</b> The ROESY spectrum of belamcandanin A (1) in CDCL <sub>3</sub>               | 13    |
| <b>Figure S11.</b> The UV spectrum of belamcandanin B (2) in MeOH                               | 14    |
| <b>Figure S12.</b> The CD spectrum of belamcandanin B (2) in MeOH                               | 15    |
| <b>Figure S13.</b> The IR spectrum of belamcandanin B (2)                                       | 16    |
| <b>Figure S14.</b> The HRESI spectrum of belamcandanin B (2)                                    | 17    |
| <b>Figure S15.</b> The <sup>1</sup> H NMR spectrum of belamcandanin B (2) in CDCL <sub>3</sub>  | 18    |
| <b>Figure S16.</b> The <sup>13</sup> C NMR spectrum of belamcandanin B (2) in CDCL <sub>3</sub> | 19    |
| <b>Figure S17.</b> The HMQC spectrum of belamcandanin B (2) in CDCL <sub>3</sub>                | 20    |
| <b>Figure S18.</b> The HMBC spectrum of belamcandanin B (2) in CDCL <sub>3</sub>                | 21    |
| <b>Figure S19.</b> The ROESY spectrum of belamcandanin B (2) in CDCL <sub>3</sub>               | 22    |
| <b>Figure S20.</b> The UV spectrum of belamcandanin C (3) in MeOH                               | 23    |
| <b>Figure S21.</b> The CD spectrum of belamcandanin C (3) in MeOH                               | 24    |
| <b>Figure S22.</b> The IR spectrum of belamcandanin C (3)                                       | 25    |
| <b>Figure S23.</b> The HRESI spectrum of belamcandanin C (3)                                    | 26    |
| <b>Figure S24.</b> The <sup>1</sup> H NMR spectrum of belamcandanin C (3) in CDCL <sub>3</sub>  | 27    |
| <b>Figure S25.</b> The <sup>13</sup> C NMR spectrum of belamcandanin C (3) in CDCL <sub>3</sub> | 28    |
| <b>Figure S26.</b> The HMQC spectrum of belamcandanin C (3) in CDCL <sub>3</sub>                | 29    |
| <b>Figure S27.</b> The HMBC spectrum of belamcandanin C (3) in CDCL <sub>3</sub>                | 30    |
| <b>Figure S28.</b> The ROESY spectrum of belamcandanin C (3) in CDCL <sub>3</sub>               | 31    |
| <b>Figure S29.</b> The UV spectrum of belamcanolide A (4) in MeOH                               | 32    |
| <b>Figure S30.</b> The CD spectrum of belamcanolide A (4) in MeOH                               | 33    |
| <b>Figure S31.</b> The IR spectrum of belamcanolide A (4)                                       | 34    |
| <b>Figure S32.</b> The HRESI spectrum of belamcanolide A (4)                                    | 35    |
| <b>Figure S33.</b> The <sup>1</sup> H NMR spectrum of belamcanolide A (4) in CDCL <sub>3</sub>  | 36    |
| <b>Figure S34.</b> The <sup>13</sup> C NMR spectrum of belamcanolide A (4) in CDCL <sub>3</sub> | 37    |
| <b>Figure S35.</b> The COSY spectrum of belamcanolide A (4) in CDCL <sub>3</sub>                | 38    |
| <b>Figure S36.</b> The HMQC spectrum of belamcanolide A (4) in CDCL <sub>3</sub>                | 39    |
| <b>Figure S37.</b> The HMBC spectrum of belamcanolide A (4) in CDCL <sub>3</sub>                | 40    |
| <b>Figure S38.</b> The ROESY spectrum of belamcanolide A (4) in CDCL <sub>3</sub>               | 41    |
| <b>Figure S39.</b> The UV spectrum of belamcanoxide A (5) in MeOH                               | 42    |
| <b>Figure S40.</b> The CD spectrum of belamcanoxide A (5) in MeOH                               | 43    |

|                                                                                                       |    |
|-------------------------------------------------------------------------------------------------------|----|
| <b>Figure S41</b> The IR spectrum of belamcanoxide A ( <b>5</b> )                                     | 44 |
| <b>Figure S42</b> The HRESI spectrum of belamcanoxide A ( <b>5</b> )                                  | 45 |
| <b>Figure S43</b> The $^1\text{H}$ NMR spectrum of belamcanoxide A ( <b>5</b> ) in $\text{CDCl}_3$    | 46 |
| <b>Figure S44</b> The $^{13}\text{C}$ NMR spectrum of belamcanoxide A ( <b>5</b> ) in $\text{CDCl}_3$ | 47 |
| <b>Figure S45</b> The DEPT spectrum of belamcanoxide A ( <b>5</b> ) in $\text{CDCl}_3$                | 48 |
| <b>Figure S46</b> The HMQC spectrum of belamcanoxide A ( <b>5</b> ) in $\text{CDCl}_3$                | 49 |
| <b>Figure S47</b> The HMBC spectrum of belamcanoxide A ( <b>5</b> ) in $\text{CDCl}_3$                | 50 |
| <b>Figure S48</b> The ROESY spectrum of belamcanoxide A ( <b>5</b> ) in $\text{CDCl}_3$               | 51 |

**Figure S1. The UV spectrum of belamcandinin A (1)**

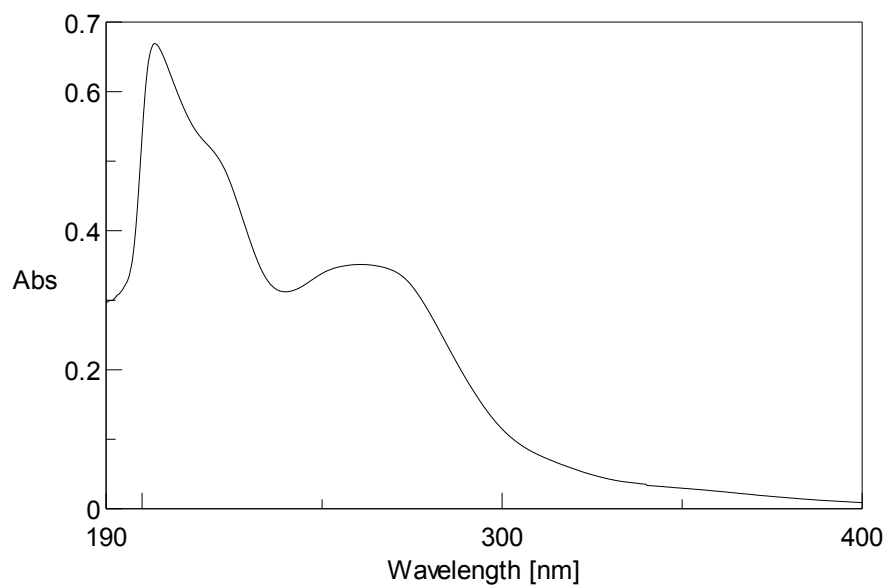

Figure S2. The IR spectrum of belamcandanin A (1)

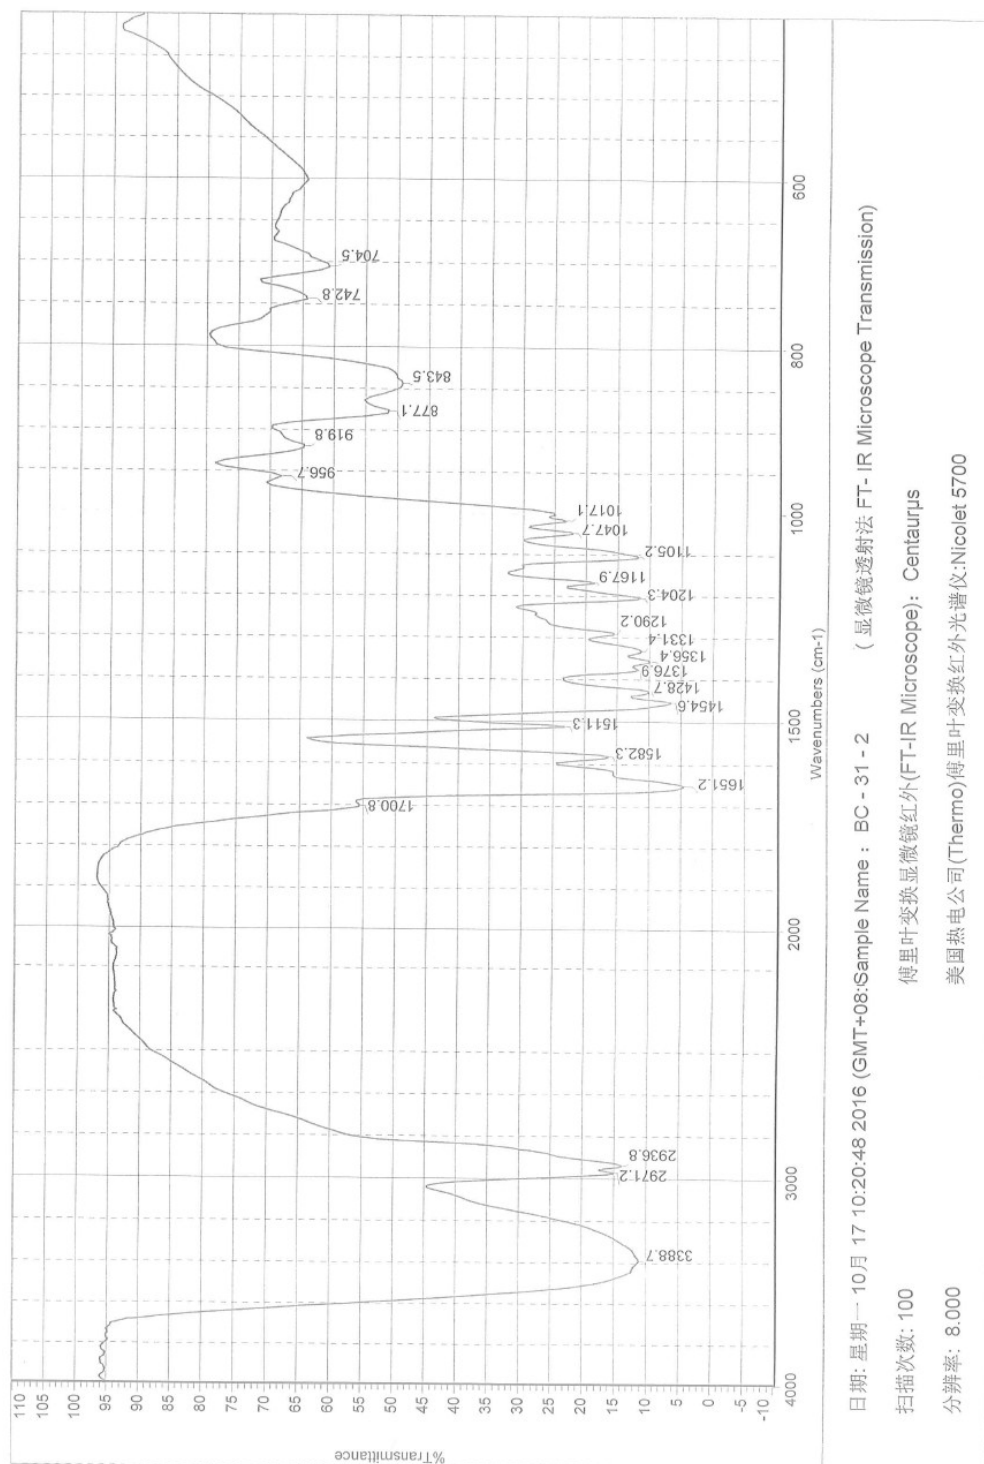

**Figure S3. The HRESI spectrum of belamcandanin A (1)**

BC-31-2 #1997 RT: 5.27 AV: 1 NL: 1.62E7  
 T: FTMS + c ESI Full ms [100.00-1000.00]

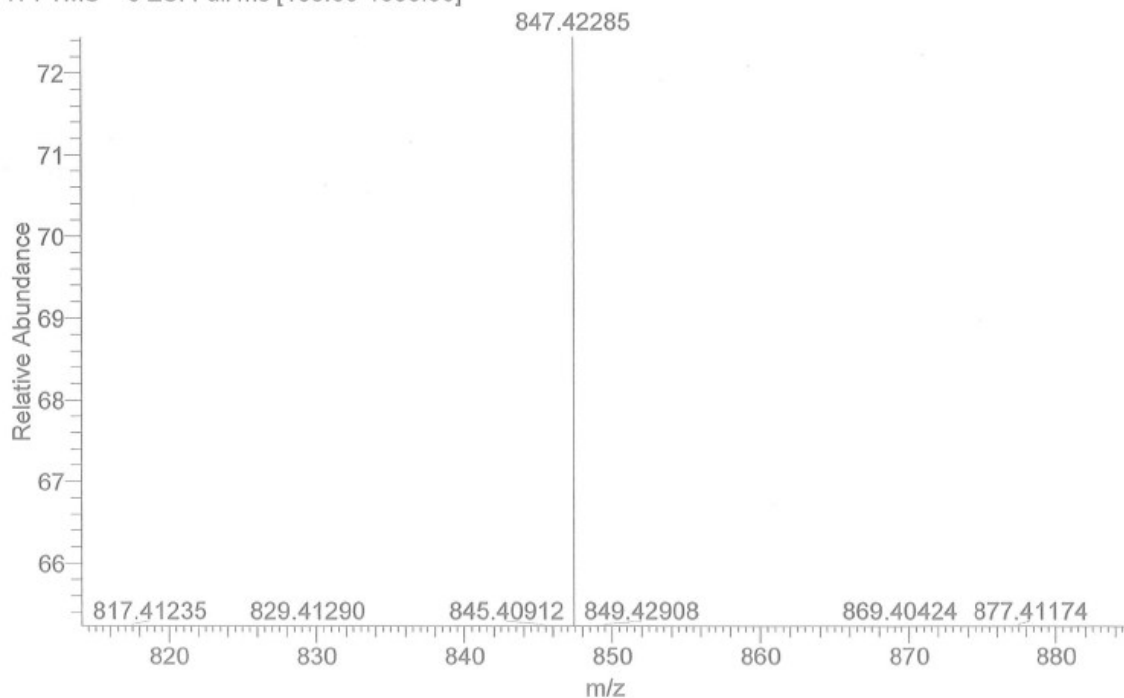

Elemental composition search on mass 847.42

m/z= 842.42-852.42

| m/z       | Theo. Mass | Delta (ppm) | RDB equiv. | Composition                                     |
|-----------|------------|-------------|------------|-------------------------------------------------|
| 847.42285 | 847.42045  | 2.84        | 26.5       | C <sub>55</sub> H <sub>59</sub> O <sub>8</sub>  |
|           | 847.42632  | -4.09       | 17.5       | C <sub>48</sub> H <sub>63</sub> O <sub>13</sub> |
|           | 847.43219  | -11.02      | 8.5        | C <sub>41</sub> H <sub>67</sub> O <sub>18</sub> |
|           | 847.41106  | 13.91       | 13.5       | C <sub>44</sub> H <sub>63</sub> O <sub>16</sub> |
|           | 847.43570  | -15.17      | 30.5       | C <sub>59</sub> H <sub>59</sub> O <sub>5</sub>  |
|           | 847.40519  | 20.84       | 22.5       | C <sub>51</sub> H <sub>59</sub> O <sub>11</sub> |
|           | 847.44157  | -22.10      | 21.5       | C <sub>52</sub> H <sub>63</sub> O <sub>10</sub> |
|           | 847.39932  | 27.77       | 31.5       | C <sub>58</sub> H <sub>55</sub> O <sub>6</sub>  |
|           | 847.44745  | -29.03      | 12.5       | C <sub>45</sub> H <sub>67</sub> O <sub>15</sub> |
|           | 847.39581  | 31.91       | 9.5        | C <sub>40</sub> H <sub>63</sub> O <sub>19</sub> |

Figure S4. The  $^1\text{H}$  NMR spectrum of belamcandinin A (1)

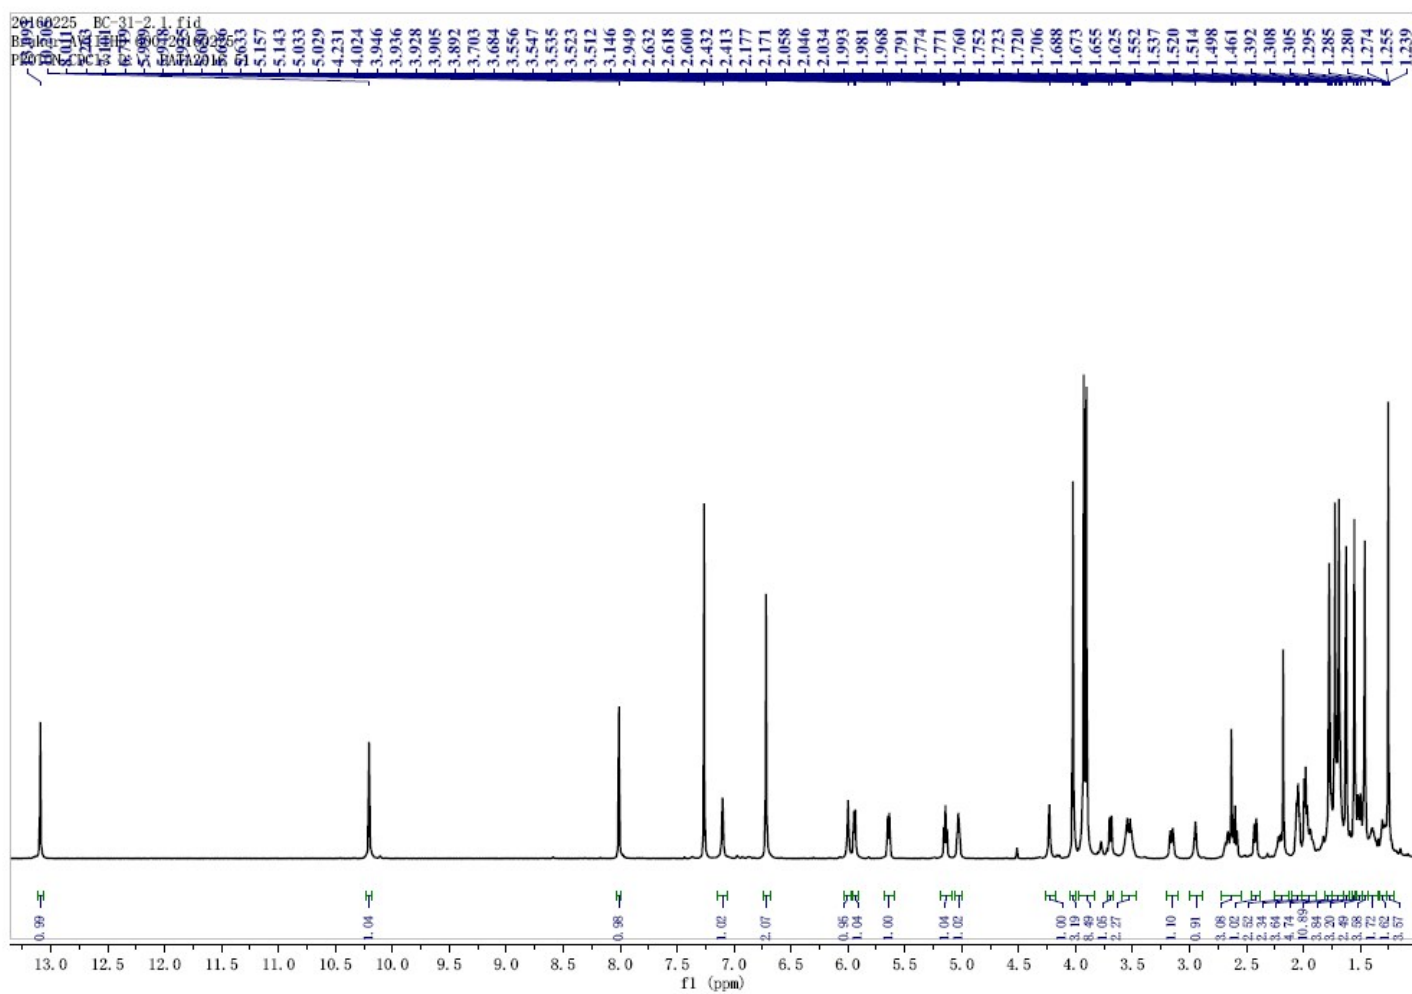

Figure S5. The  $^{13}\text{C}$  NMR spectrum of belamcandanin A (1)

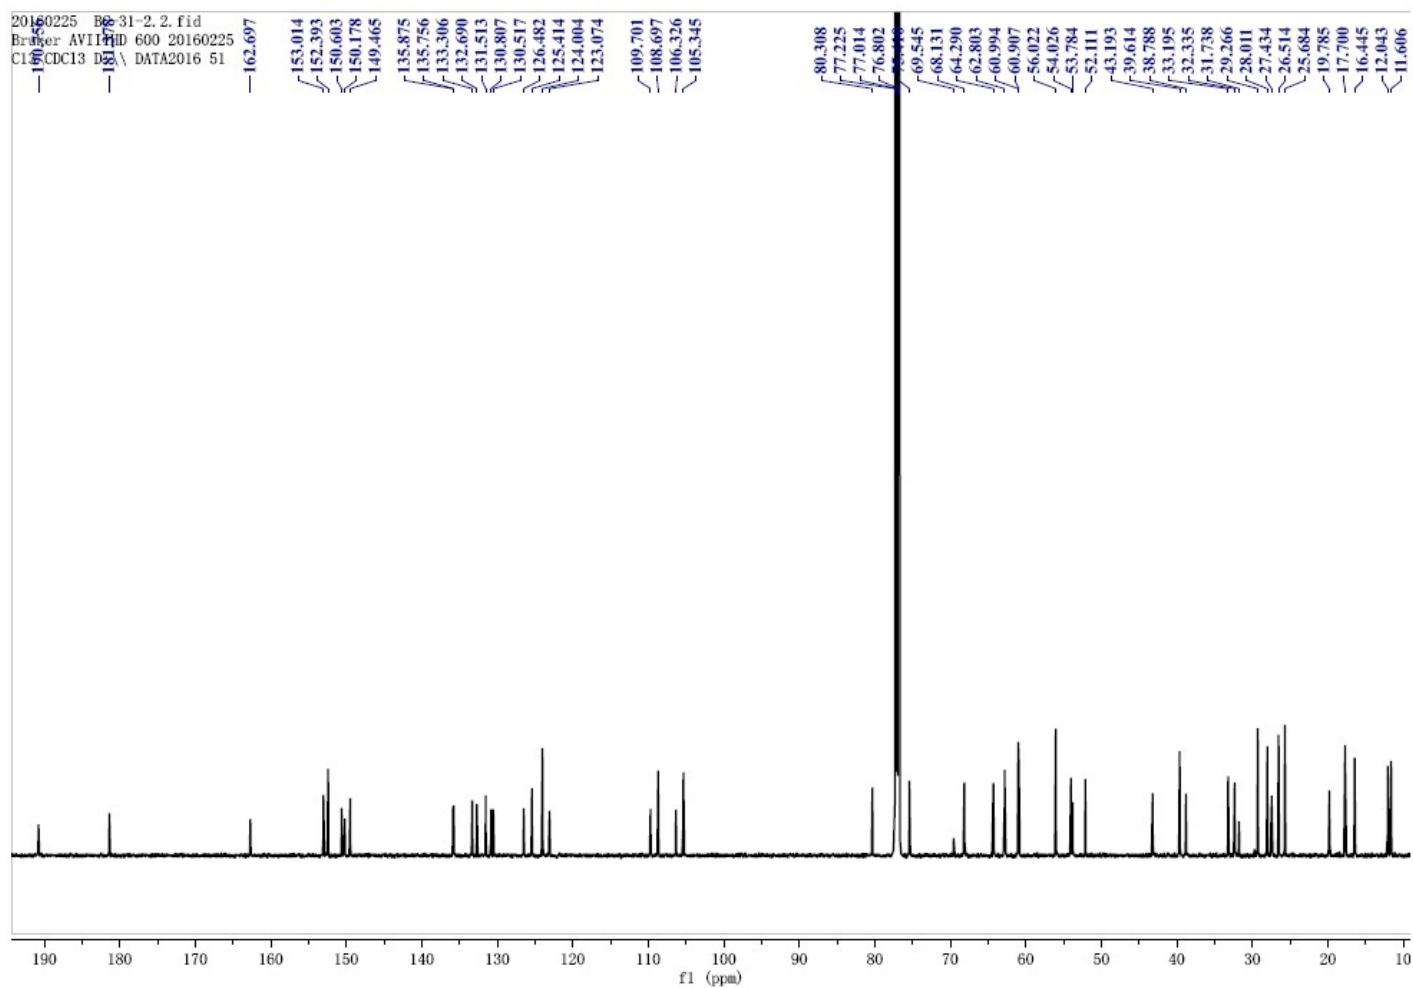



Figure S6. The DEPT spectrum of belamcandanin A (1)

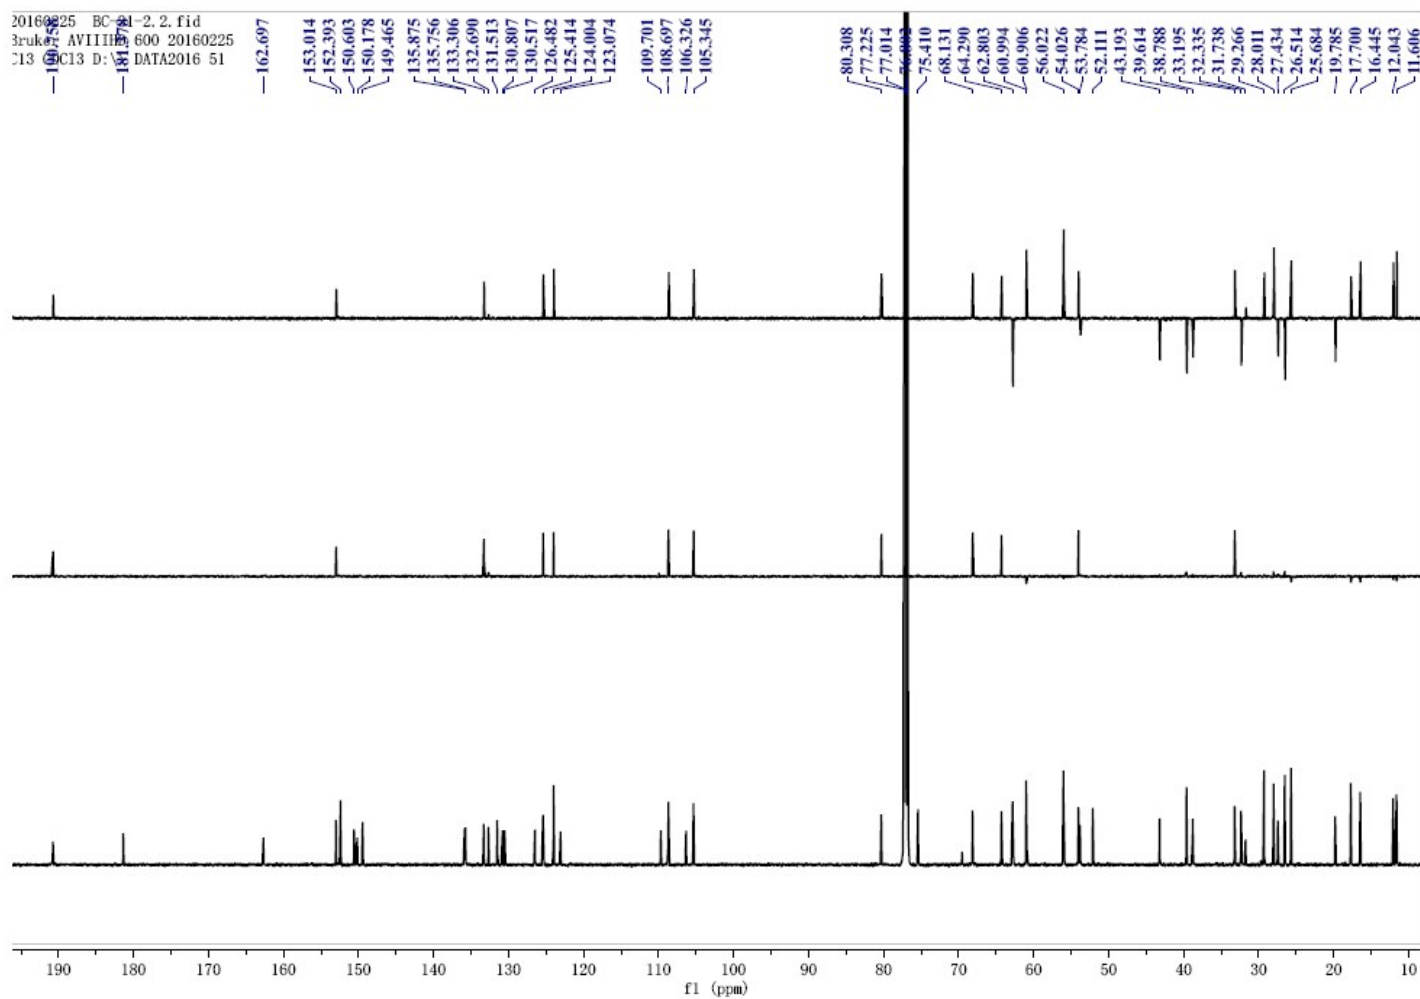

Figure S7. The  $^1\text{H}$ - $^1\text{H}$  COSY spectrum of belamcandanin A (1)

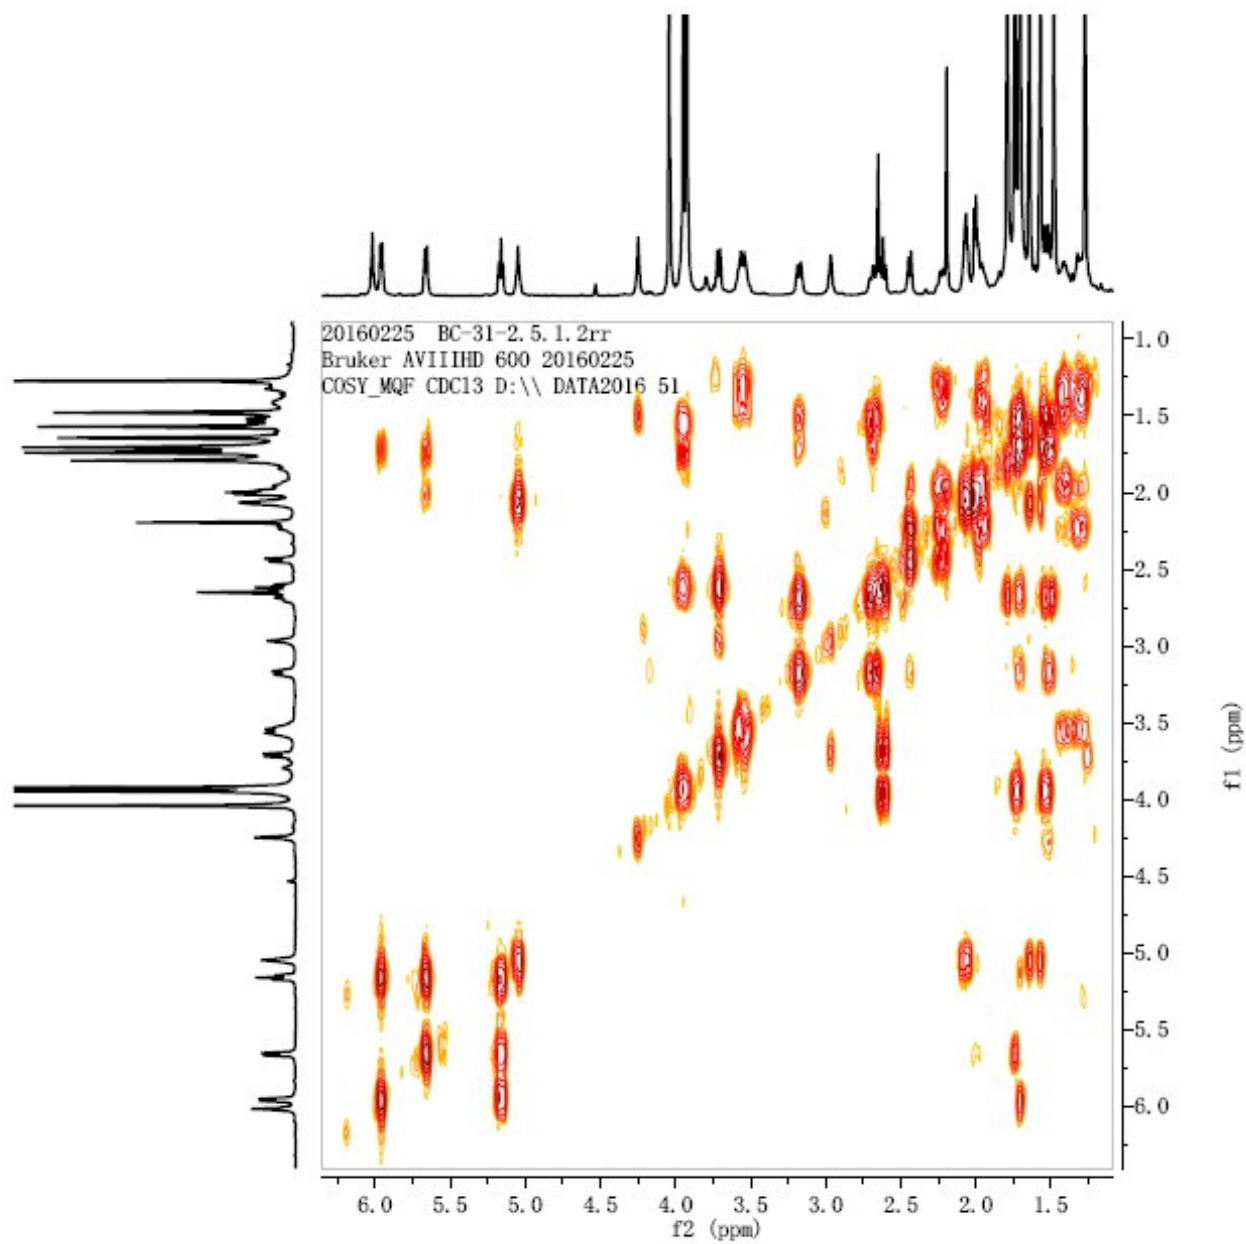

**Figure S8. The HMQC spectrum of belamcandanin A (1)**

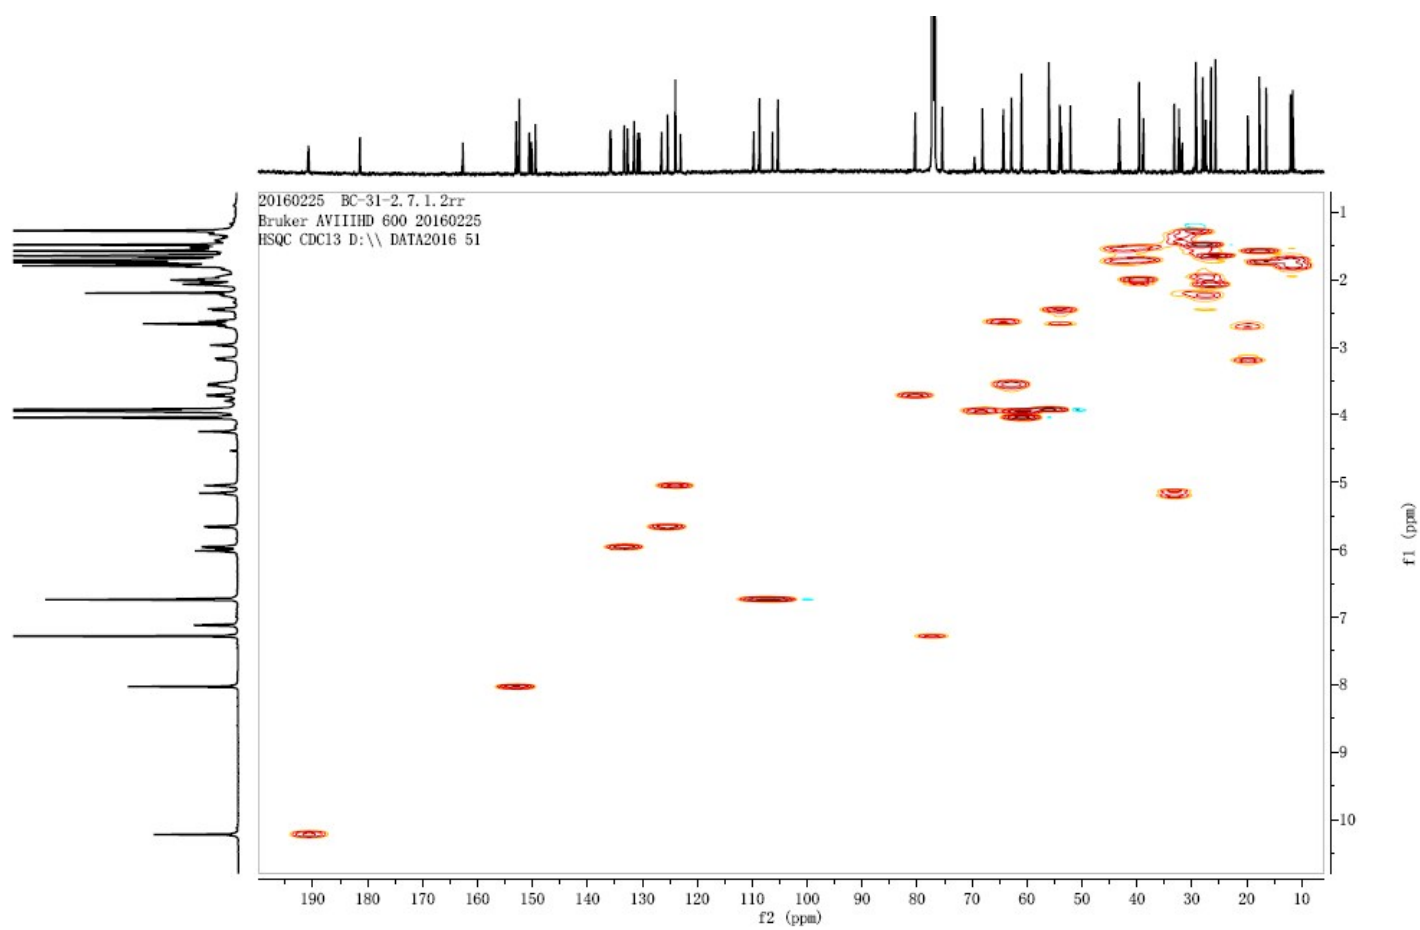

**Figure S9. The HMBC spectrum of belamcandanin A (1)**

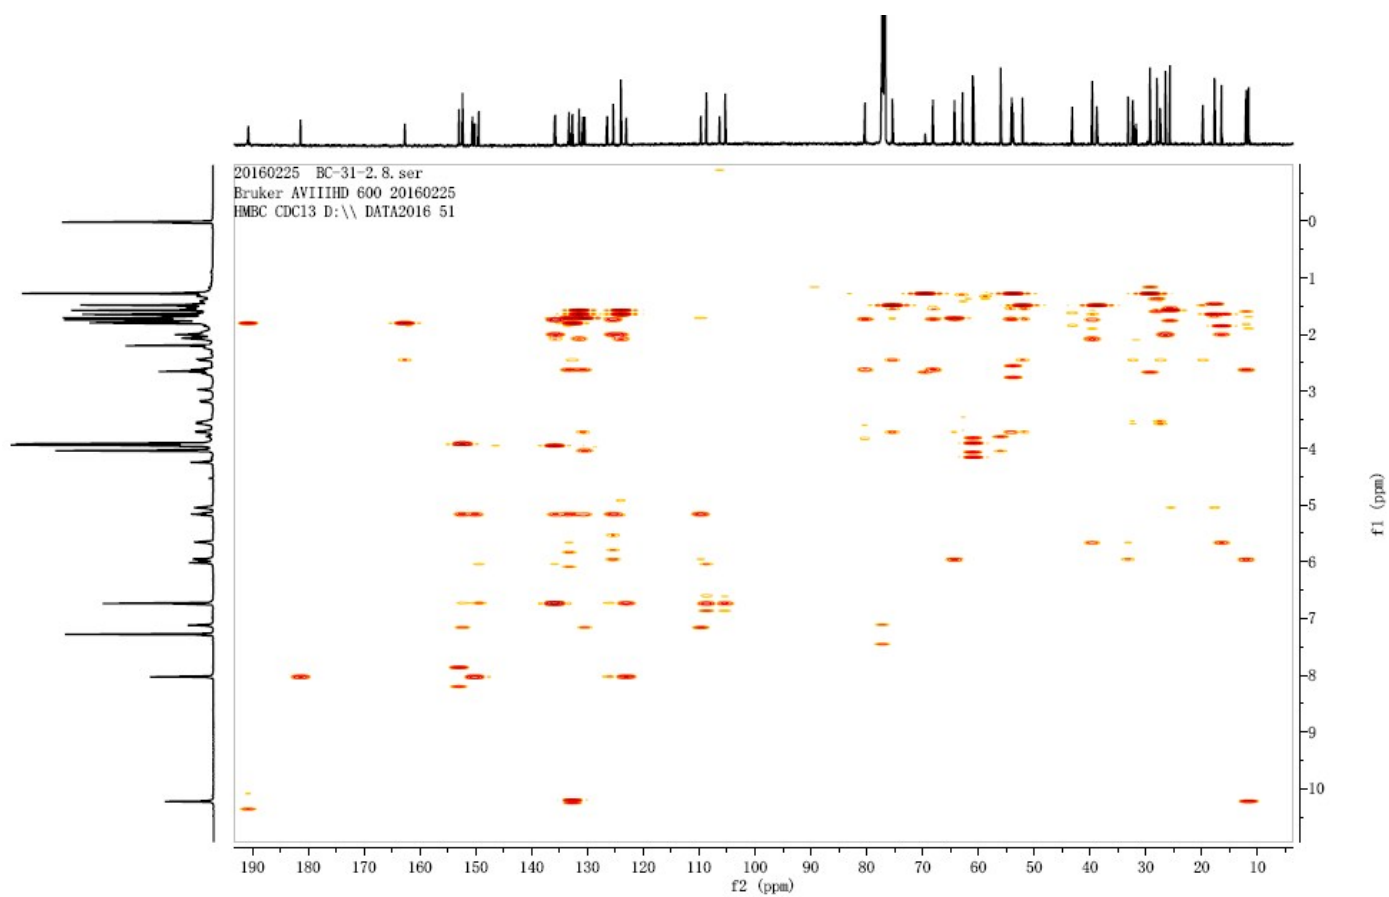

**Figure S10. The ROESY spectrum of belamcandanin A (1)**

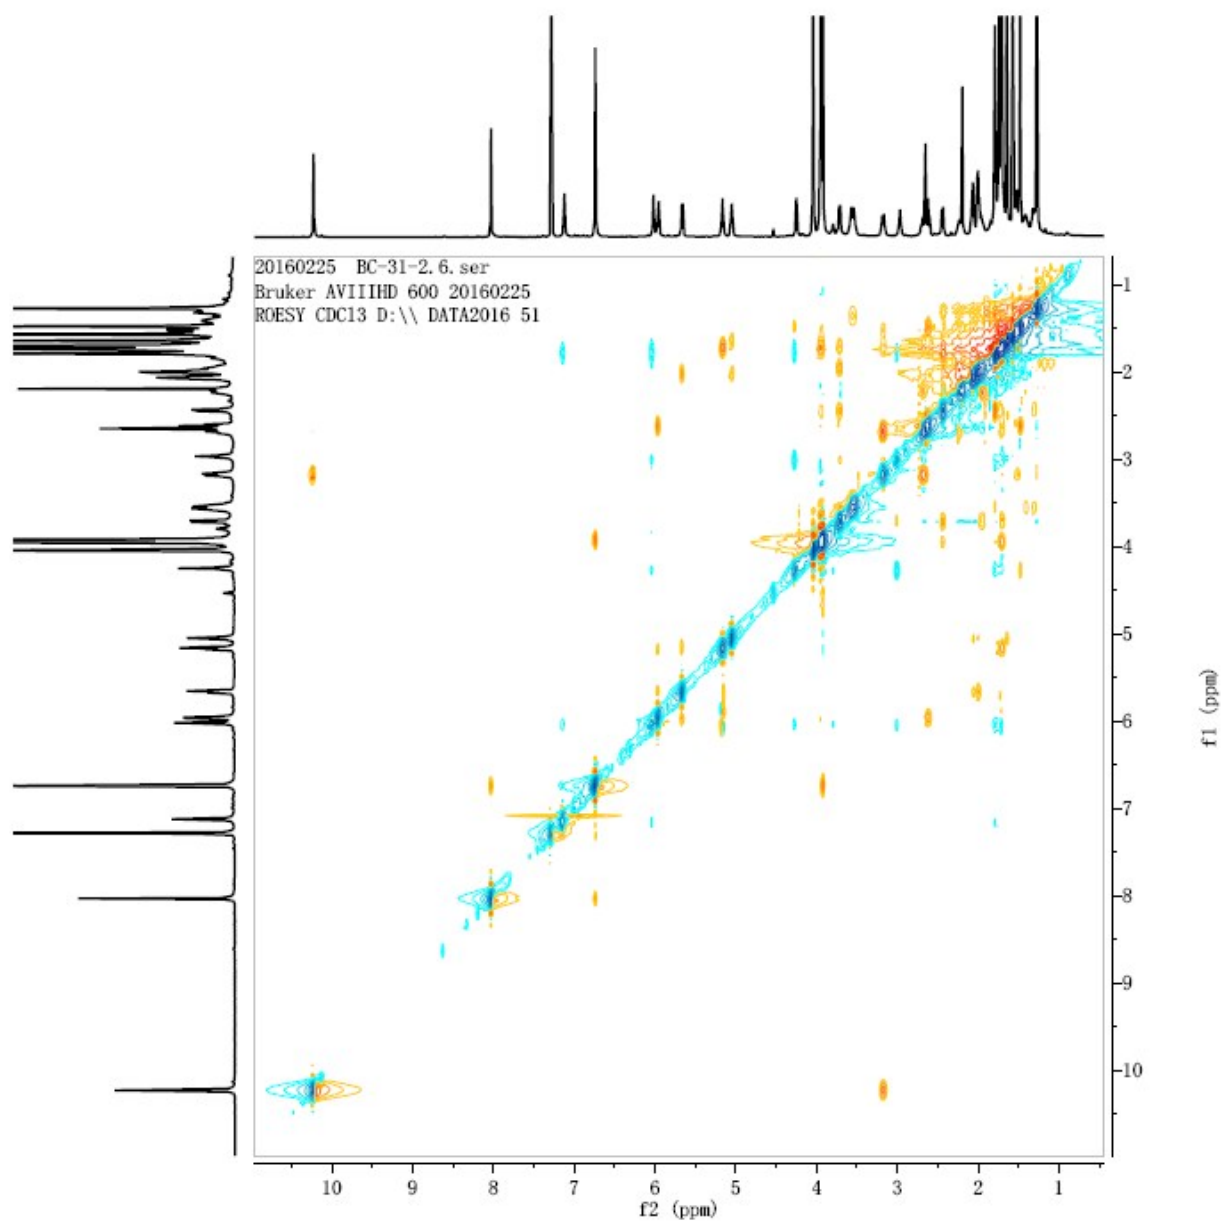

**Figure S11. The UV spectrum of belamcandinin B (2)**

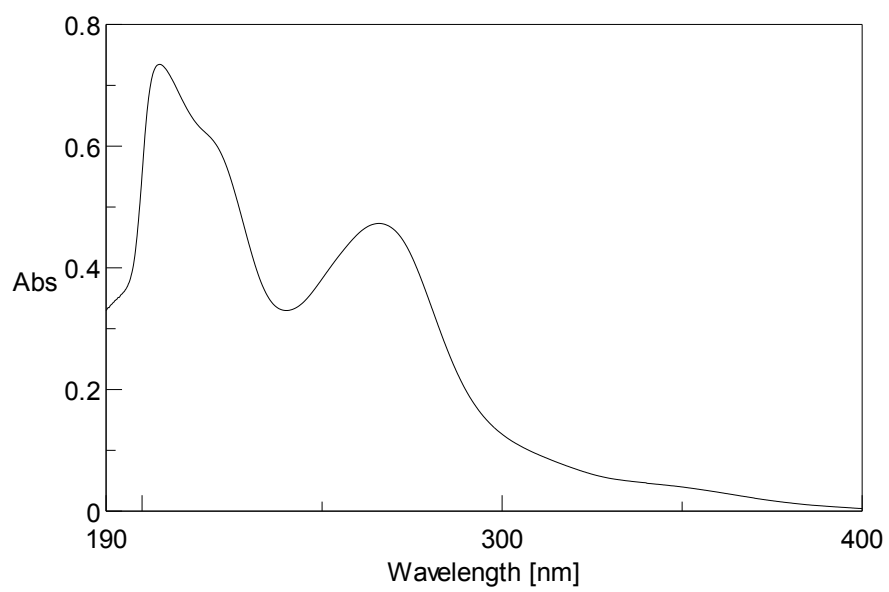

**Figure S12. The CD spectrum of belamcandanin B (2)**

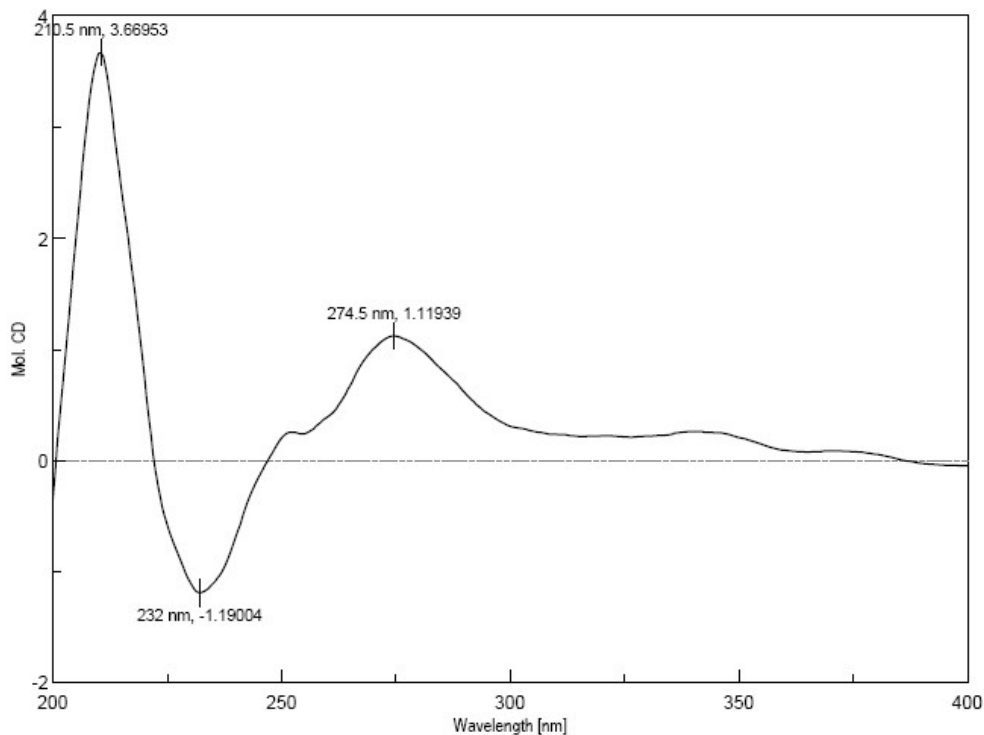

[Measurement Information]

Instrument Name IMM-CD  
Model Name J-815  
Serial No. A024461168

Accessory Standard  
Accessory S/N A024461168  
Cell Length 0.1 mm

Measurement date 2016/10/20 10:31

Photometric Mode CD, HT, Abs  
Measure Range 400 - 200 nm  
Data pitch 0.5 nm  
Sensitivity Standard  
D.I.T. 1 sec  
Bandwidth 2.00 nm  
Start Mode Immediately  
Scanning Speed 100 nm/min  
Baseline Correction Baseline  
Shutter Control Auto  
CD Detector PMT  
PMT Voltage Auto  
Accumulations 2  
Solvent MEOH  
Concentration 0.265 (w/v)%

BC-40-1-2-s-m.jws

Figure S13. The IR spectrum of belamcandanin B (2)

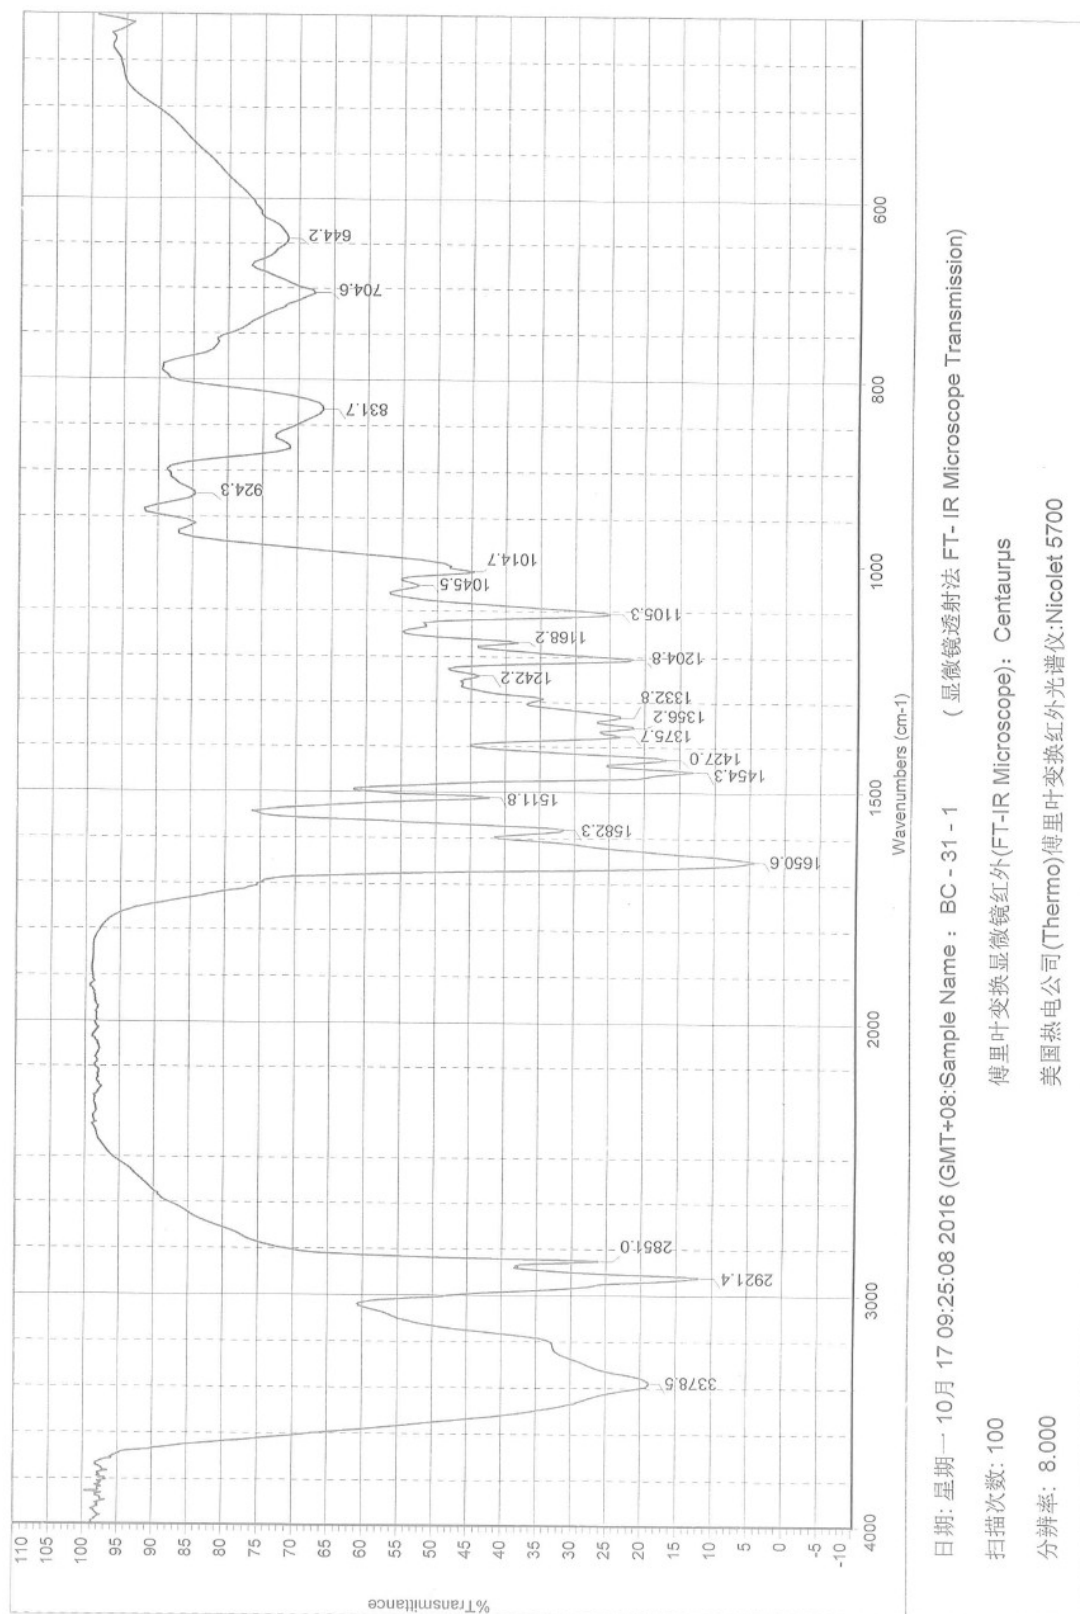



**Figure S14. The HRESI spectrum of belamcandanin B (2)**

BC-40-1 #1324 RT: 4.77 AV: 1 NL: 5.06E5  
T: FTMS + c ESI Full ms [100.00-1000.00]

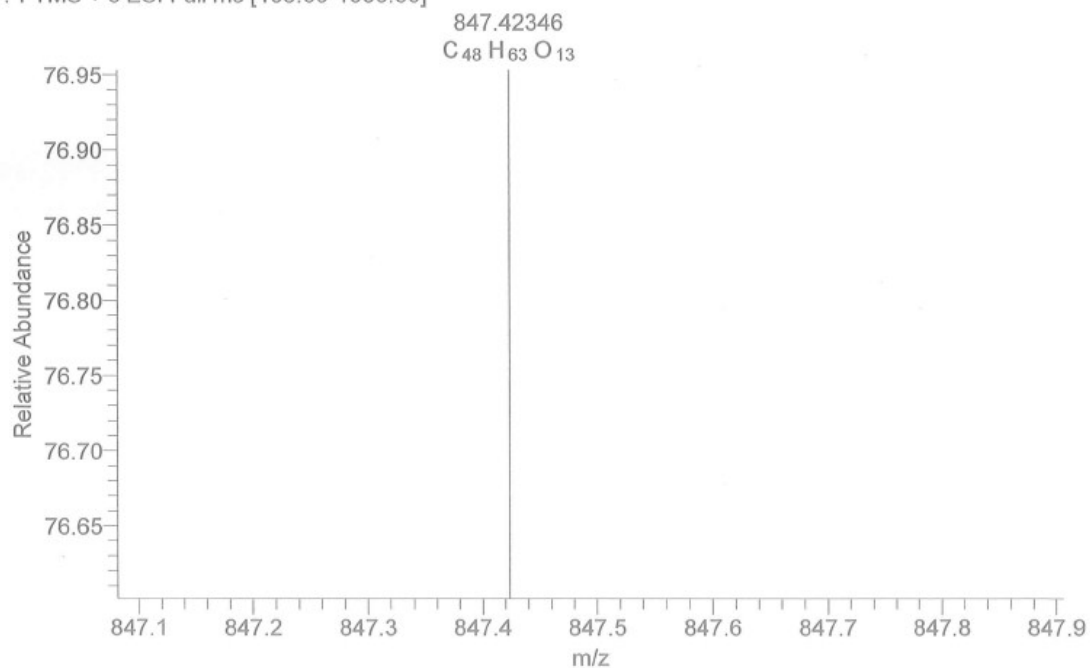

Elemental composition search on mass 847.42

m/z= 842.42-852.42

| m/z       | Theo. Mass | Delta (ppm) | RDB equiv. | Composition                                     |
|-----------|------------|-------------|------------|-------------------------------------------------|
| 847.42346 | 847.42632  | -3.37       | 17.5       | C <sub>48</sub> H <sub>63</sub> O <sub>13</sub> |
|           | 847.29603  | 150.37      | 25.5       | C <sub>48</sub> H <sub>47</sub> O <sub>14</sub> |
|           | 847.55660  | -157.12     | 9.5        | C <sub>48</sub> H <sub>79</sub> O <sub>12</sub> |

Figure S15. The <sup>1</sup>H NMR spectrum of belamcandinin B (2)

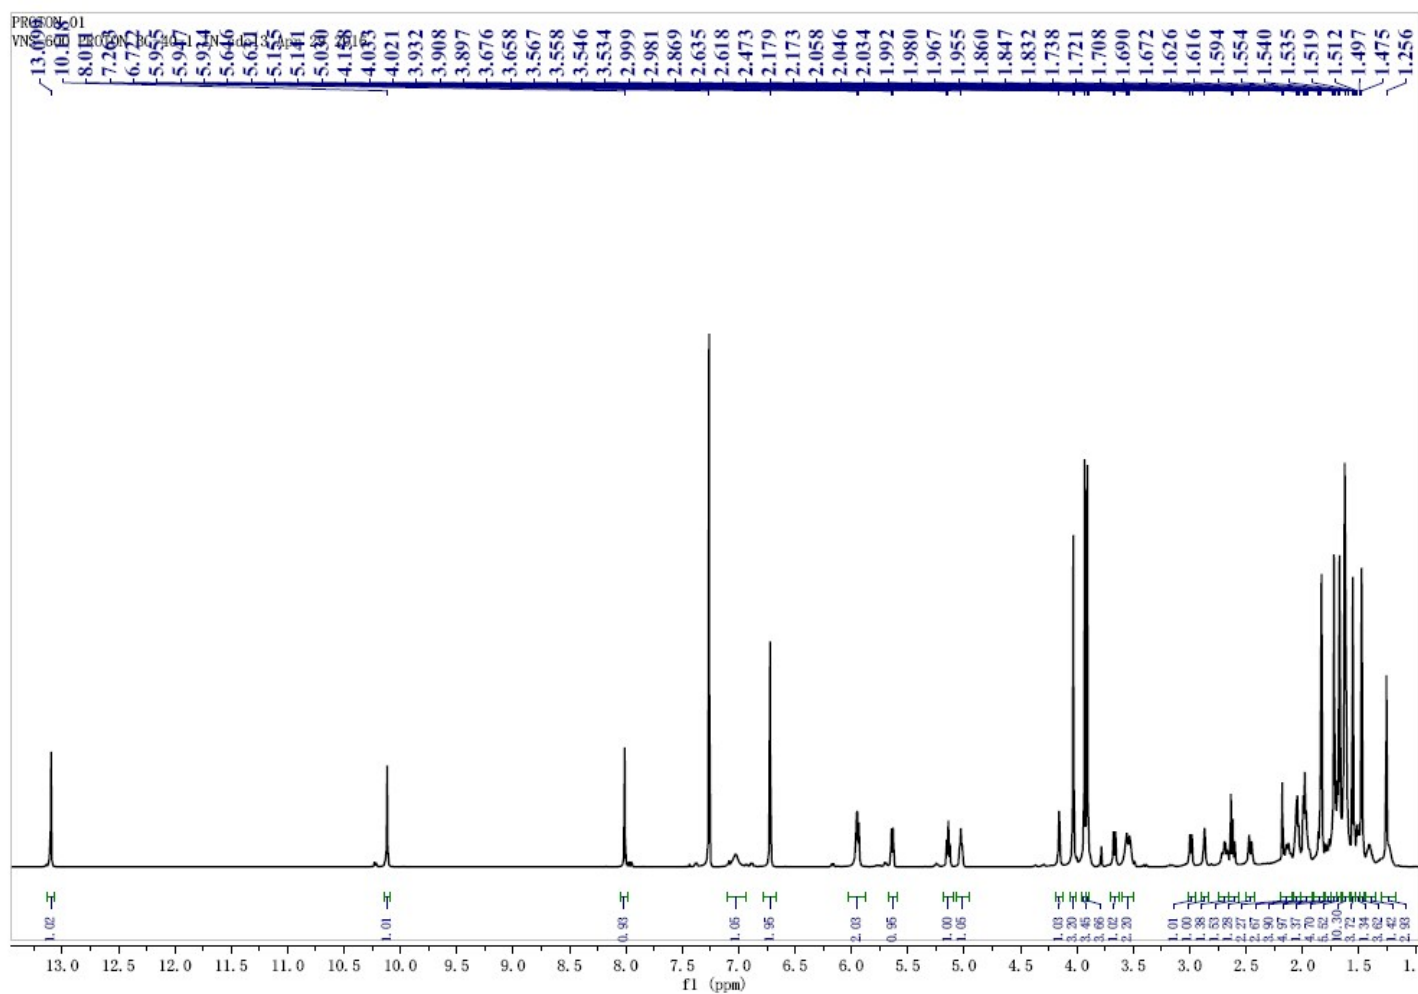

Figure S16. The  $^{13}\text{C}$  NMR spectrum of belamcandinin B (2)

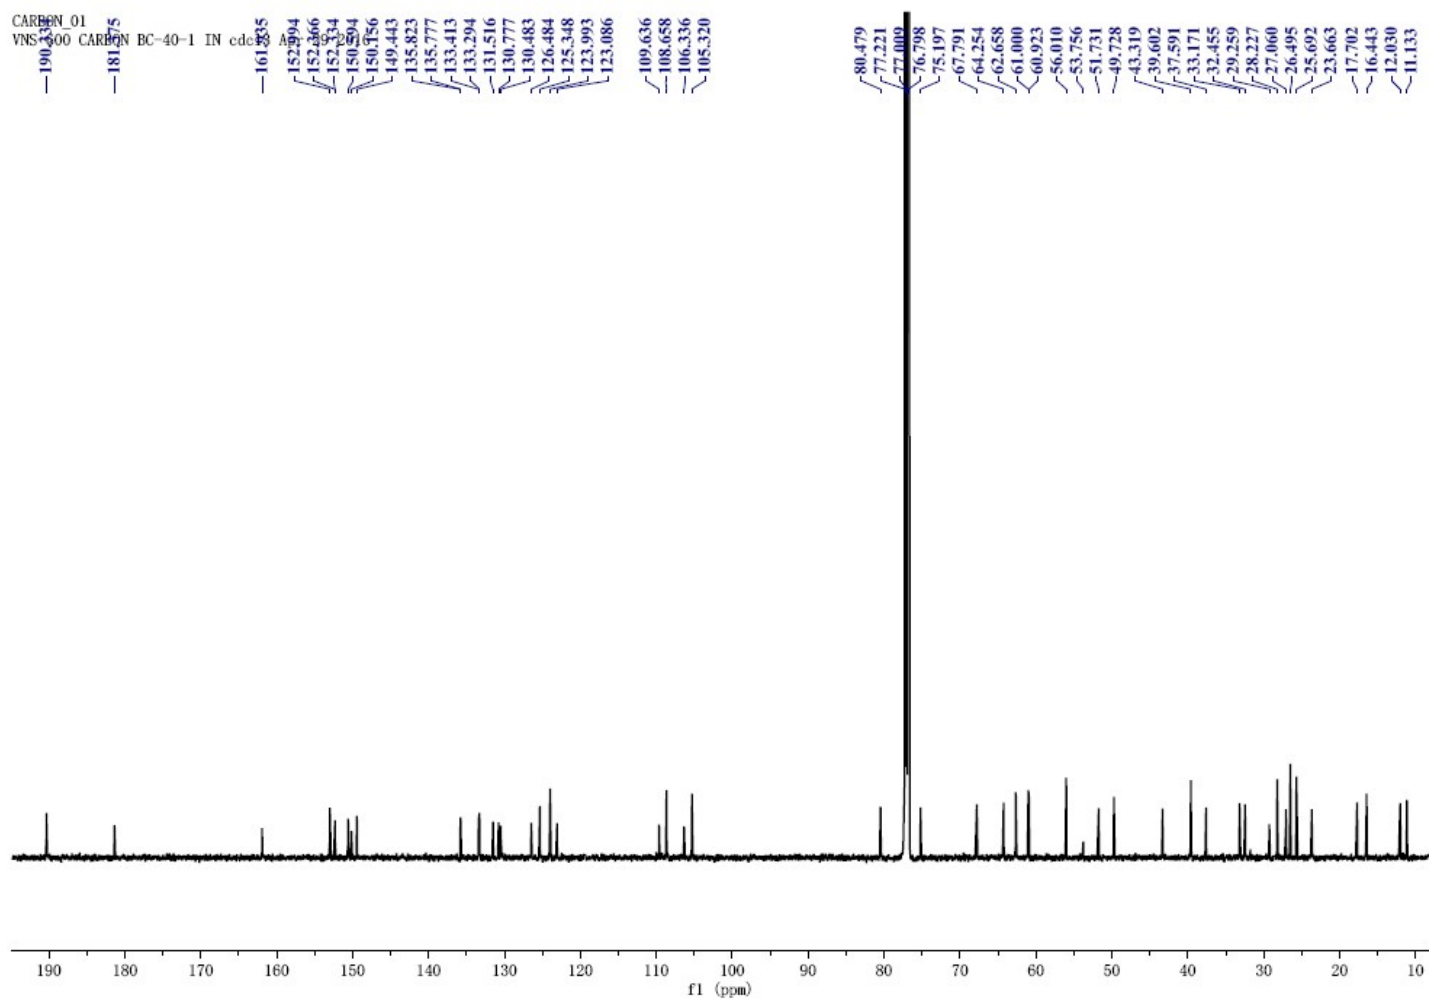

Figure S17. The HMQC spectrum of belamcandanin B (2)

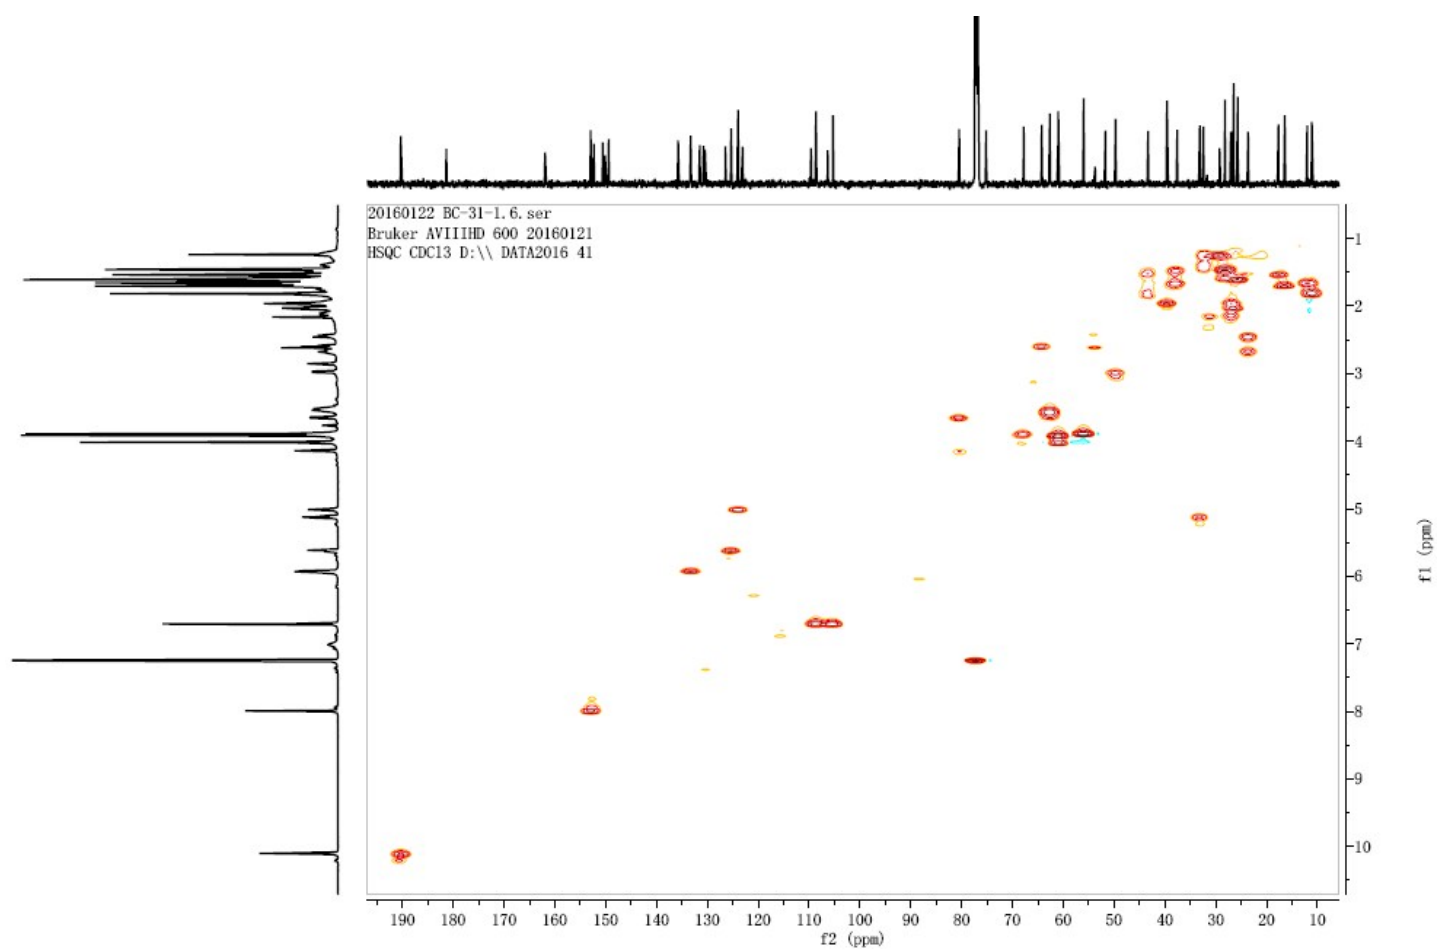

Figure S18. The HMBC spectrum of belamcandanin B (2)

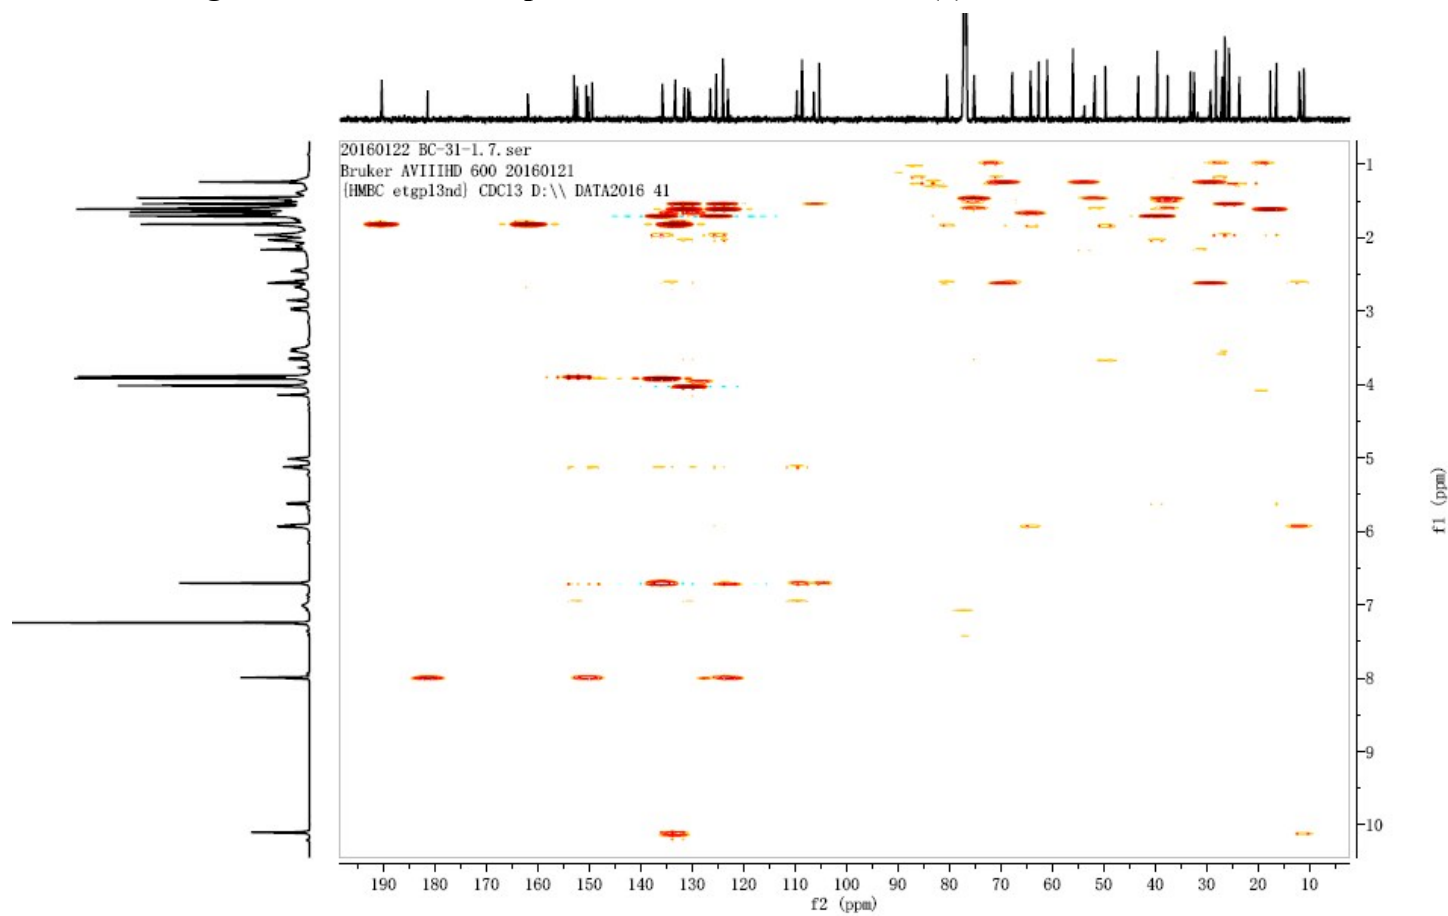

Figure S19. The ROESY spectrum of belamcandanin B (2)

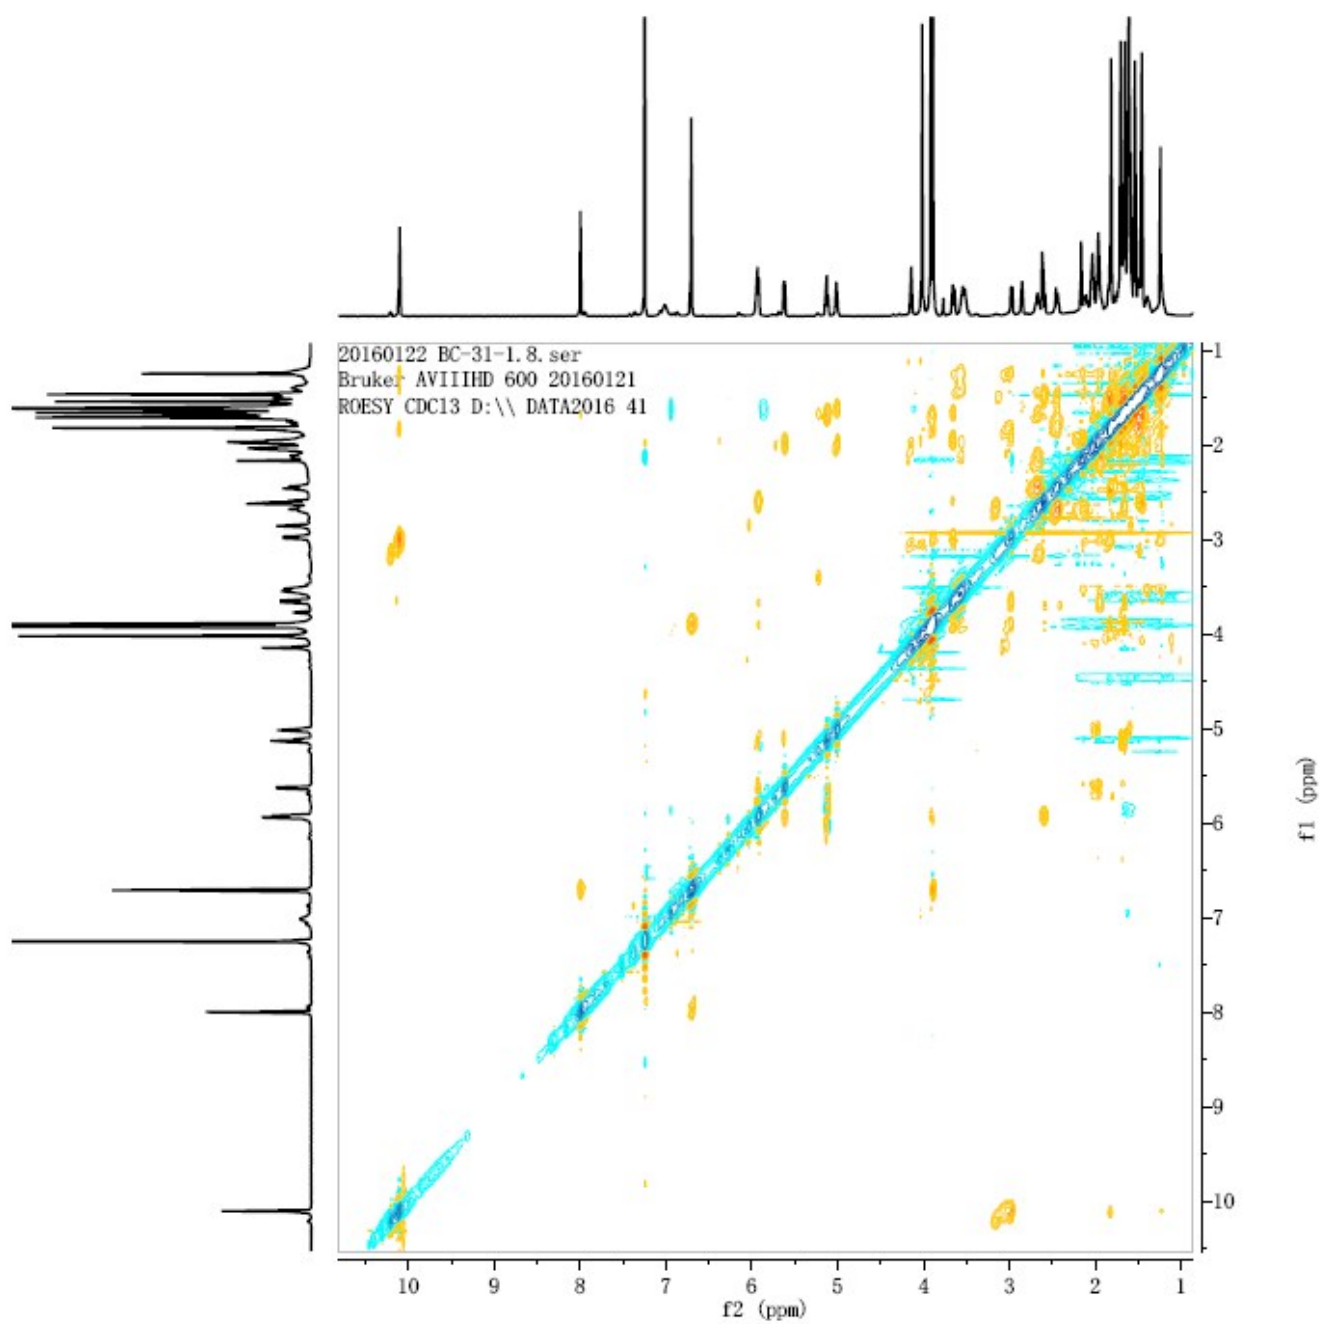

**Figure S20. The UV spectrum of belamcandinin C (3)**

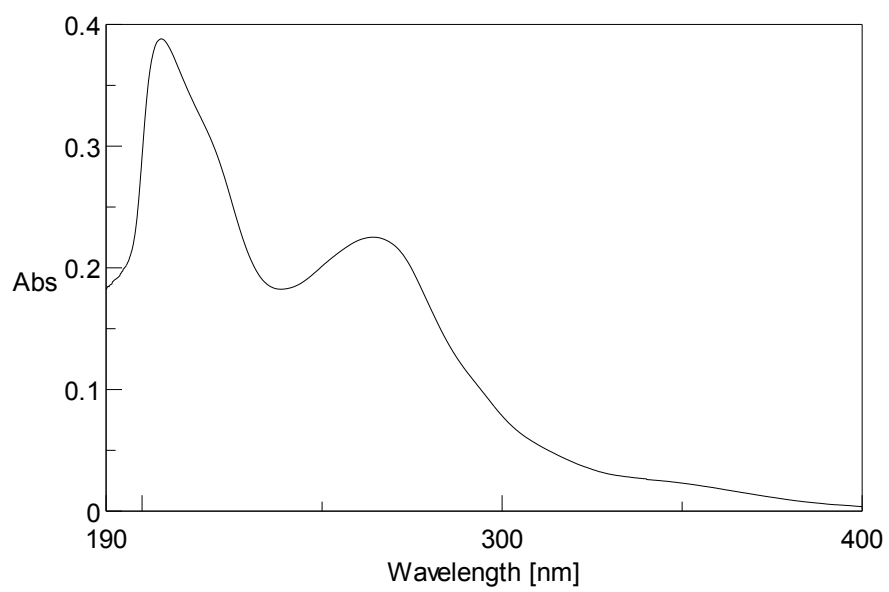

**Figure S21. The CD spectrum of belamcandanin C (3)**

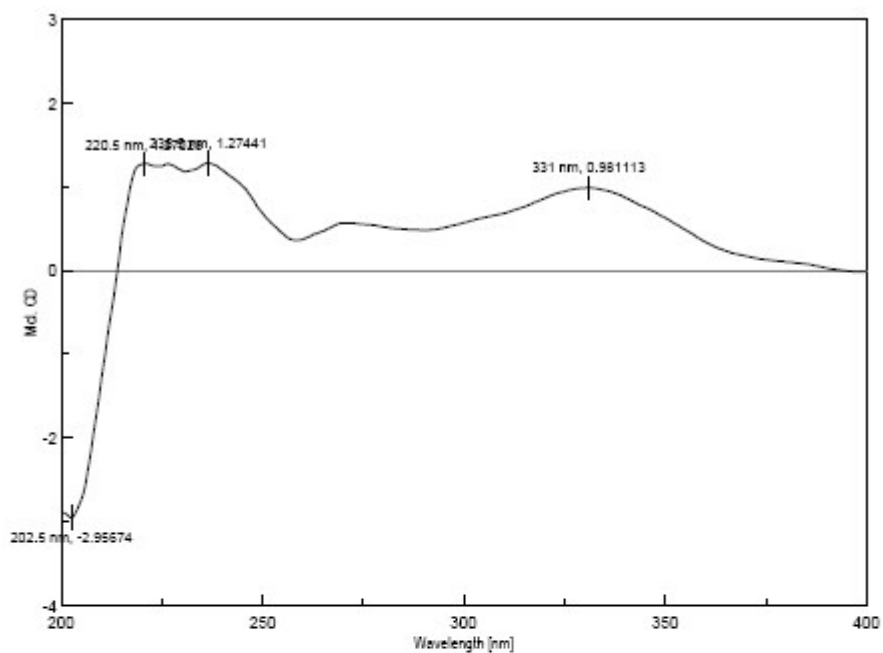

[Measurement Information]

Instrument Name IMM-CD  
 Model Name J-815  
 Serial No. A024461168

Accessory Standard  
 Accessory S/N A024461168  
 Cell Length 0.1 mm

Measurement date 2016/10/20 10:17

Photometric Mode CD, HT, Abs  
 Measure Range 400 - 200 nm  
 Data pitch 0.5 nm  
 Sensitivity Standard  
 D.I.T. 1 sec  
 Bandwidth 2.00 nm  
 Start Mode Immediately  
 Scanning Speed 100 nm/min  
 Baseline Correction Baseline  
 Shutter Control Auto  
 CD Detector PMT  
 PMT Voltage Auto  
 Accumulations 2  
 Solvent MEOH  
 Concentration 0.2613 (w/v)%

BC-43-2-3-s-m.jws



Figure S22. The IR spectrum of belamcandinin C (3)

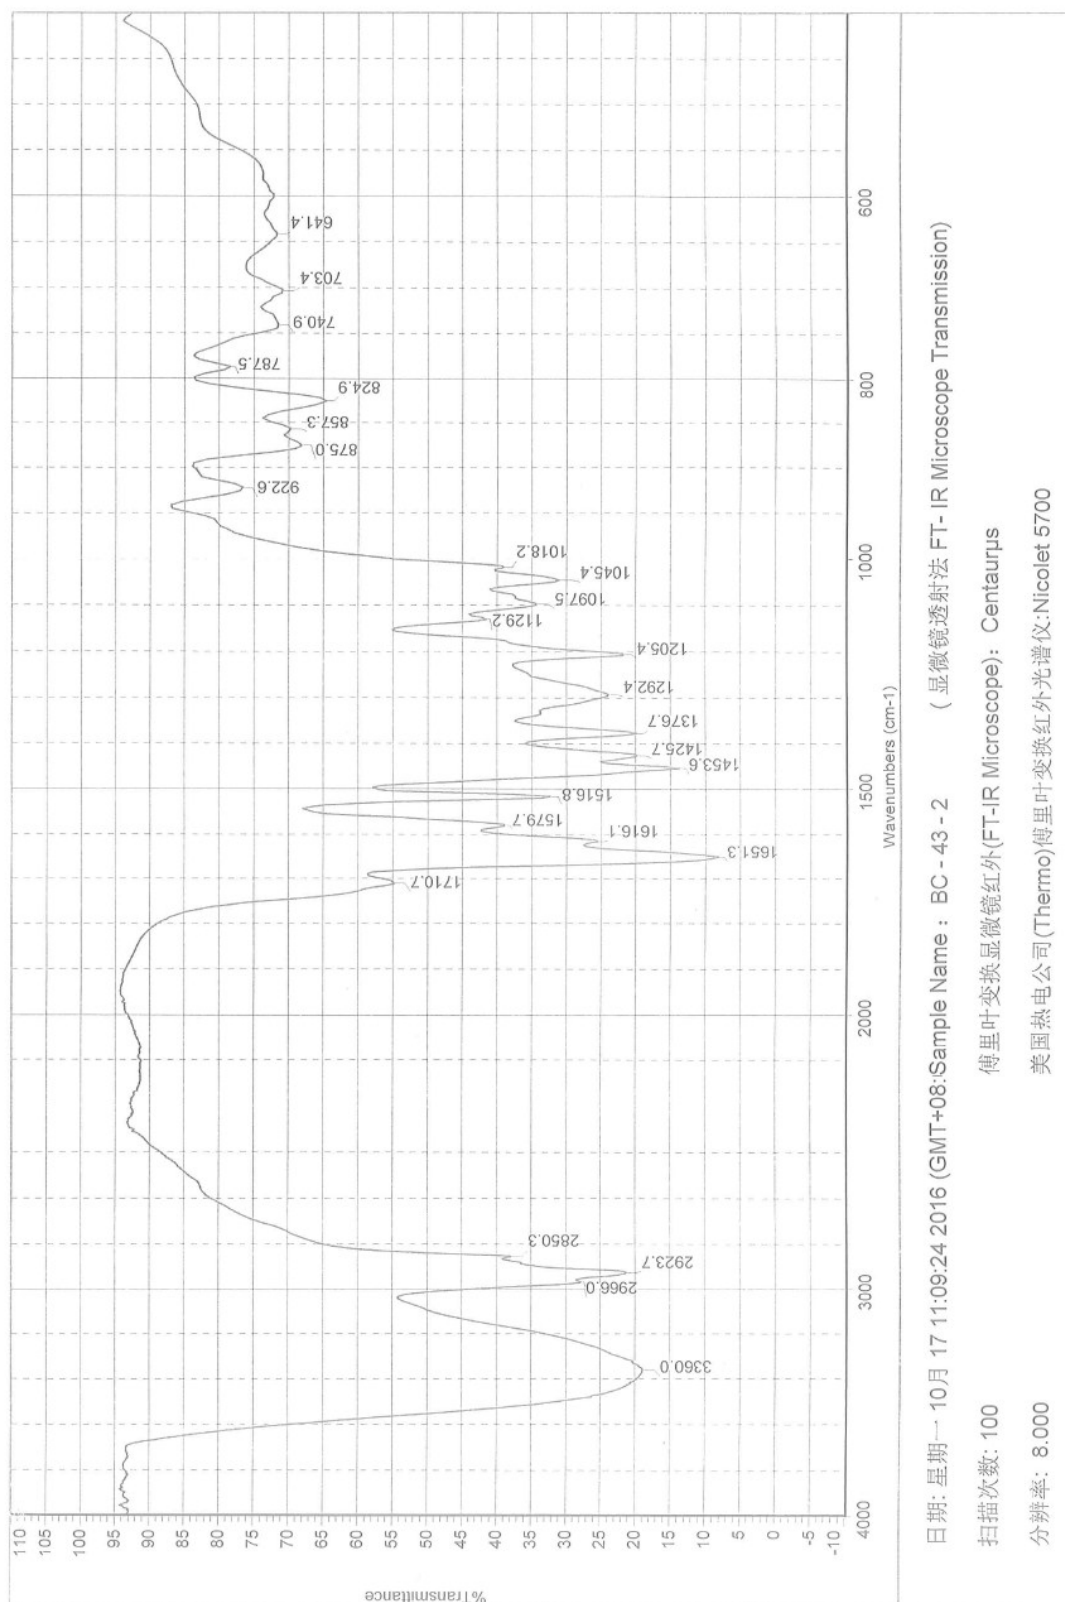

日期: 星期一 10月 17 11:09:24 2016 (GMT+08:Sample Name : BC - 43 - 2 (显微镜透射法 FT- IR Microscope Transmission)

傅里叶变换显微镜红外(FT-IR Microscope): Centaurus

扫描次数: 100 美国热电公司(Thermo)傅里叶变换红外光谱仪:Nicolet 5700

分辨率: 8.000

**Figure S23. The HRESI spectrum of belamcandanin C (3)**

BC-43-2 #1558 RT: 4.94 AV: 1 NL: 4.51E4  
 T: FTMS + c ESI Full ms [100.00-1000.00]

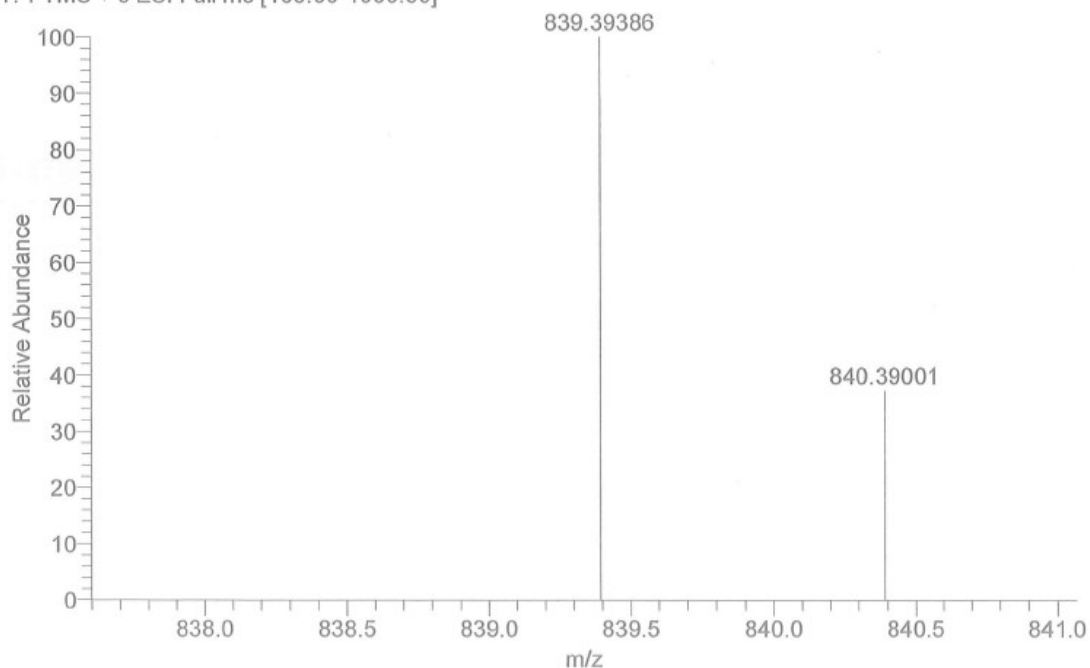

Elemental composition search on mass 839.39

m/z= 834.39-844.39

| m/z       | Theo. Mass | Delta (ppm) | RDB equiv. | Composition                                        |
|-----------|------------|-------------|------------|----------------------------------------------------|
| 839.39386 | 839.39423  | -0.44       | 29.5       | C <sub>56</sub> H <sub>55</sub> O <sub>7</sub>     |
|           | 839.39183  | 2.42        | 26.5       | C <sub>54</sub> H <sub>56</sub> O <sub>7</sub> Na  |
|           | 839.39072  | 3.74        | 7.5        | C <sub>38</sub> H <sub>63</sub> O <sub>20</sub>    |
|           | 839.39770  | -4.57       | 17.5       | C <sub>47</sub> H <sub>60</sub> O <sub>12</sub> Na |
|           | 839.38832  | 6.61        | 4.5        | C <sub>36</sub> H <sub>64</sub> O <sub>20</sub> Na |
|           | 839.40010  | -7.44       | 20.5       | C <sub>49</sub> H <sub>59</sub> O <sub>12</sub>    |
|           | 839.38485  | 10.74       | 16.5       | C <sub>45</sub> H <sub>59</sub> O <sub>15</sub>    |
|           | 839.40357  | -11.57      | 8.5        | C <sub>40</sub> H <sub>64</sub> O <sub>17</sub> Na |
|           | 839.38244  | 13.60       | 13.5       | C <sub>43</sub> H <sub>60</sub> O <sub>15</sub> Na |
|           | 839.40598  | -14.44      | 11.5       | C <sub>42</sub> H <sub>63</sub> O <sub>17</sub>    |

Figure S24. The  $^1\text{H}$  NMR spectrum of belamcandarin C (3)

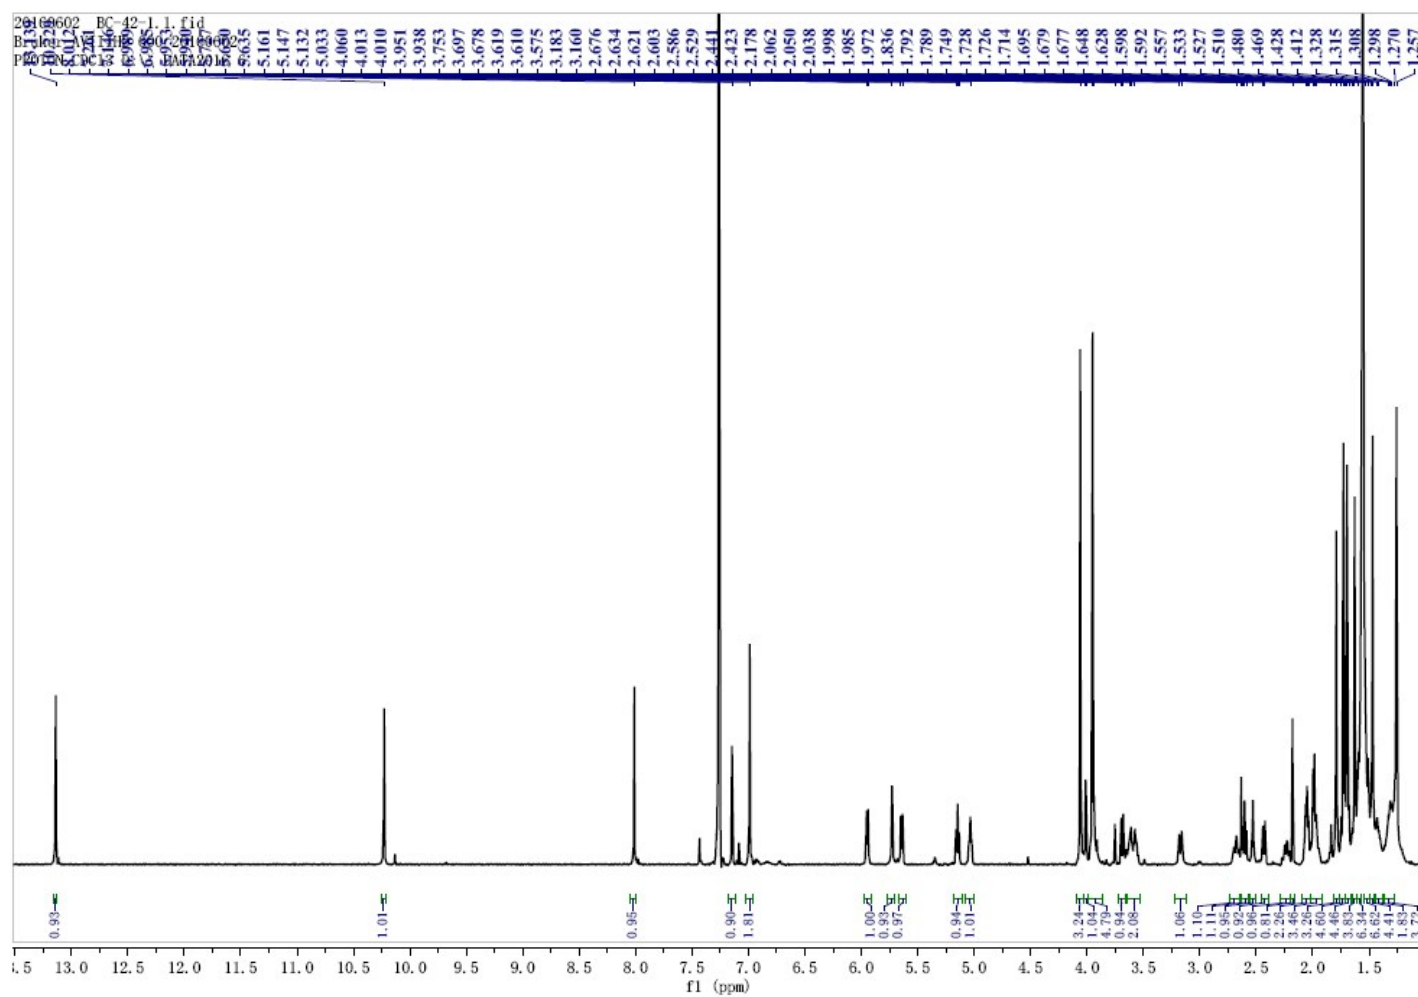

Figure S25. The  $^{13}\text{C}$  NMR spectrum of belamcandinin C (3)

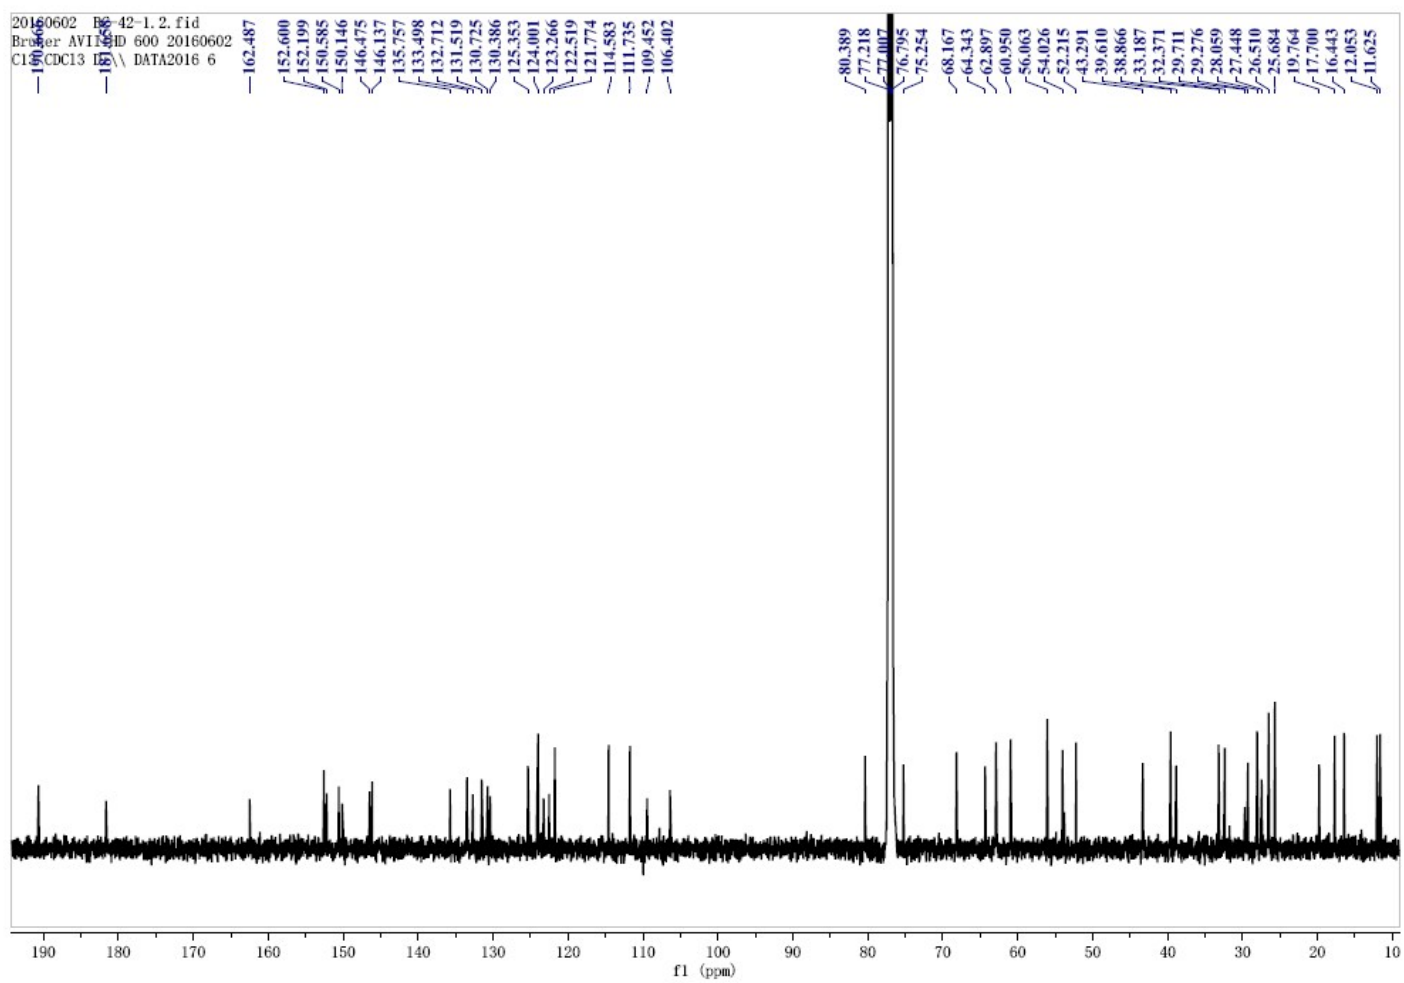

Figure S26. The HMQC spectrum of belamcandanin C (3)

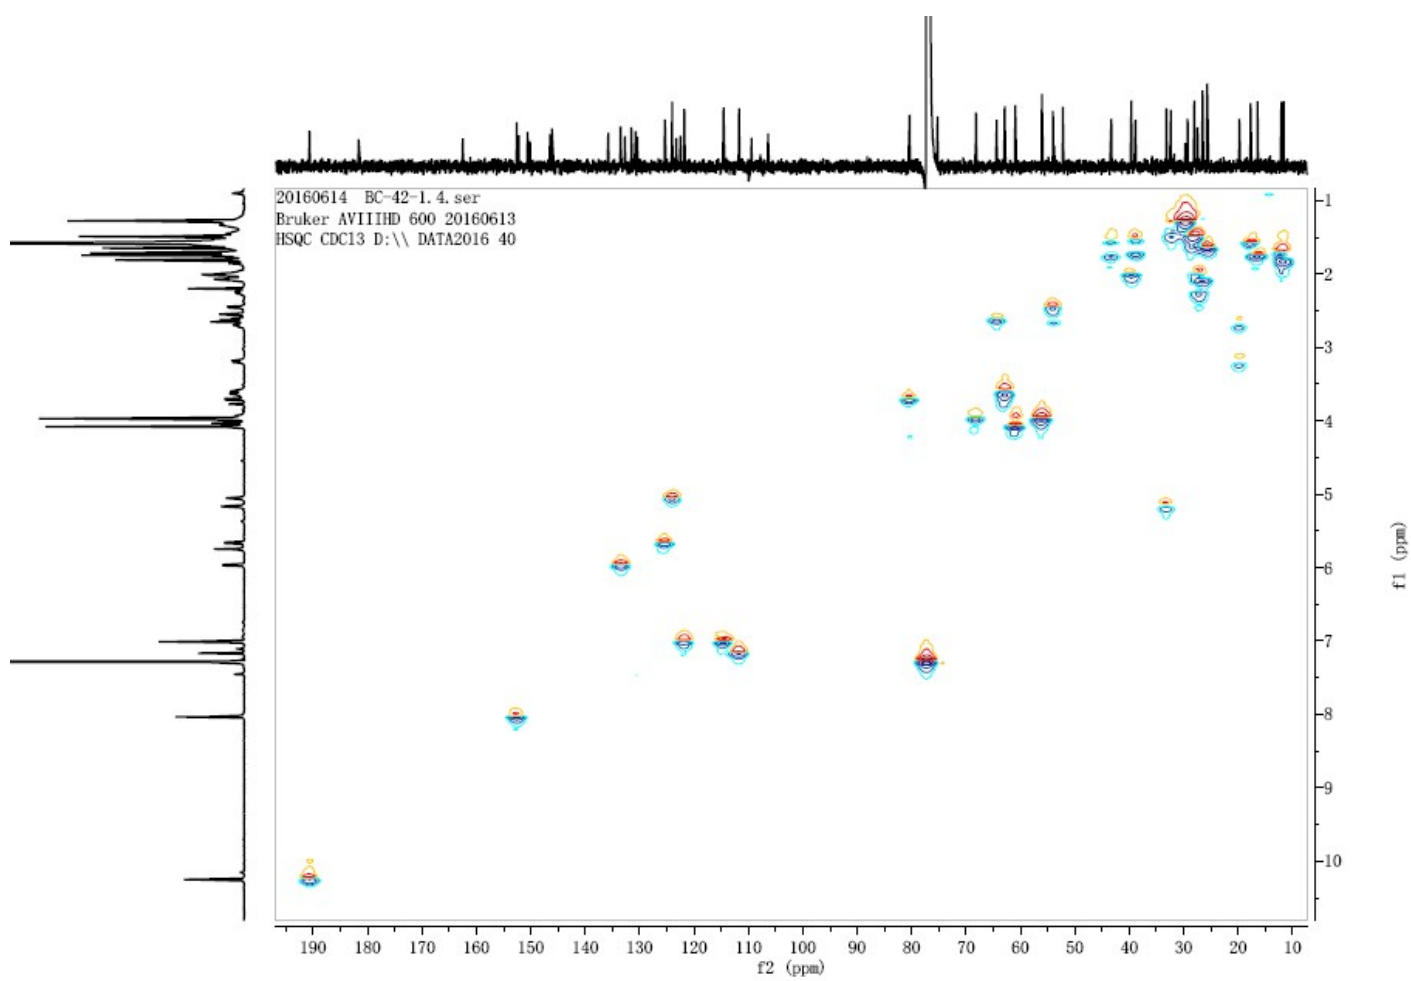

Figure S27. The HMBC spectrum of belamcandanin C (3)

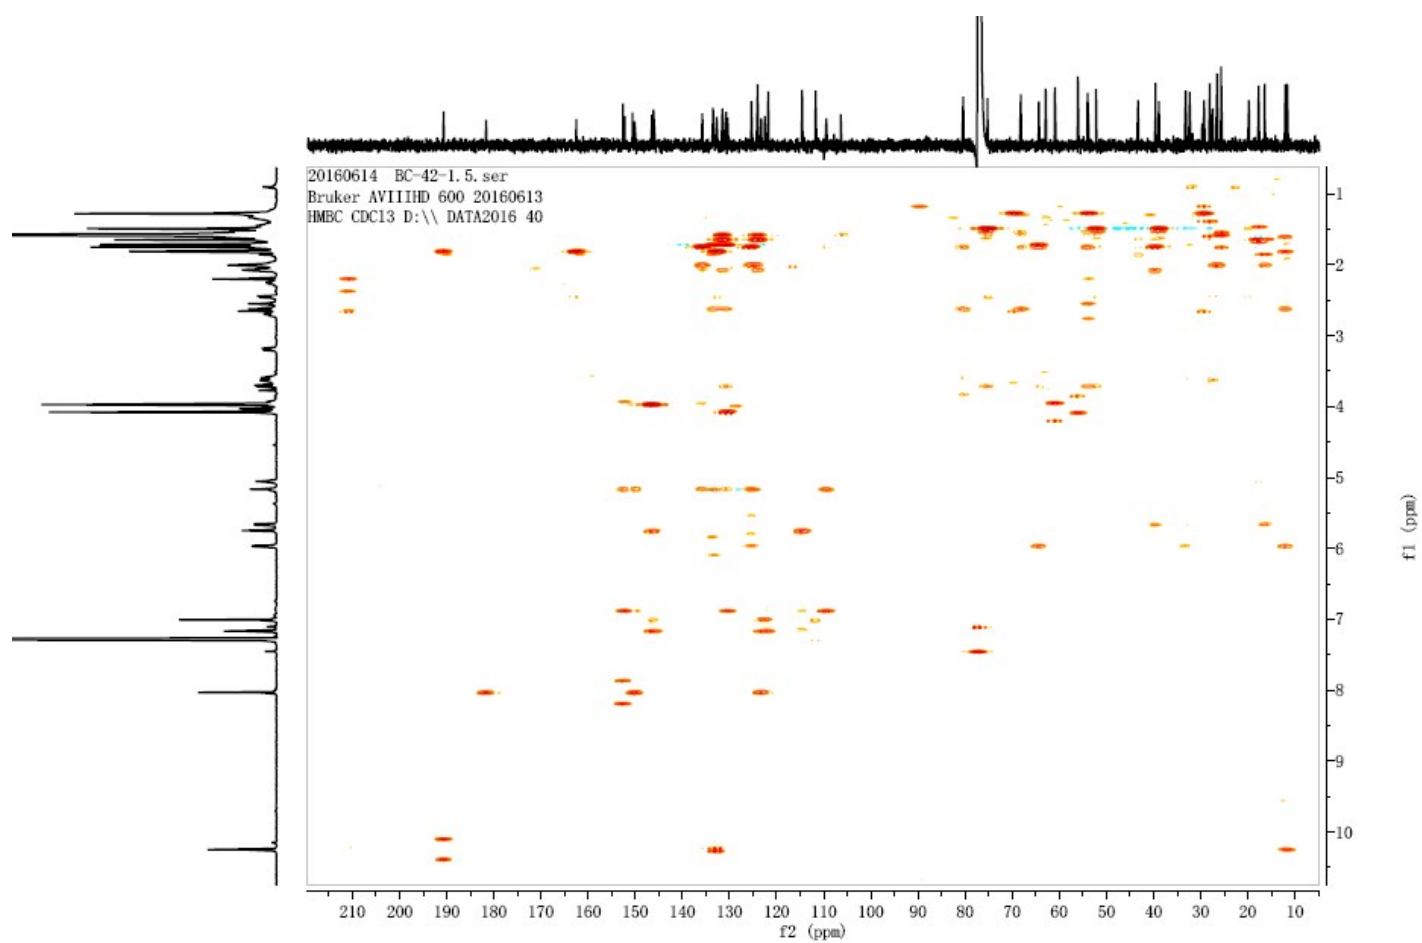

Figure S28. The ROESY spectrum of belamcandarin C (3)

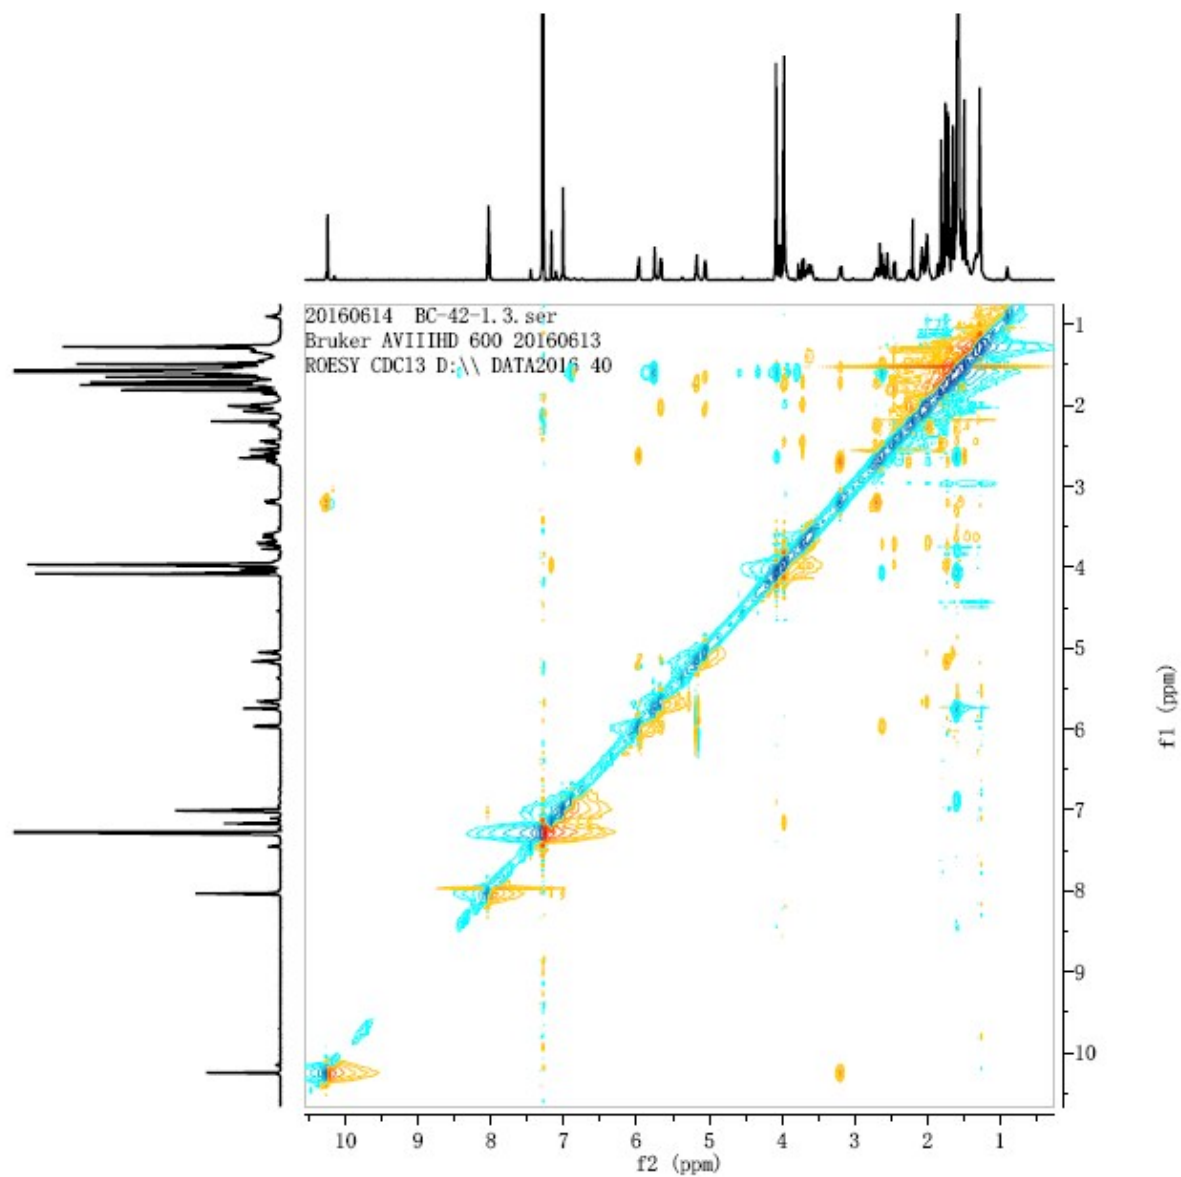

**Figure S29. The UV spectrum of belamcanolide A (4) in MeOH**

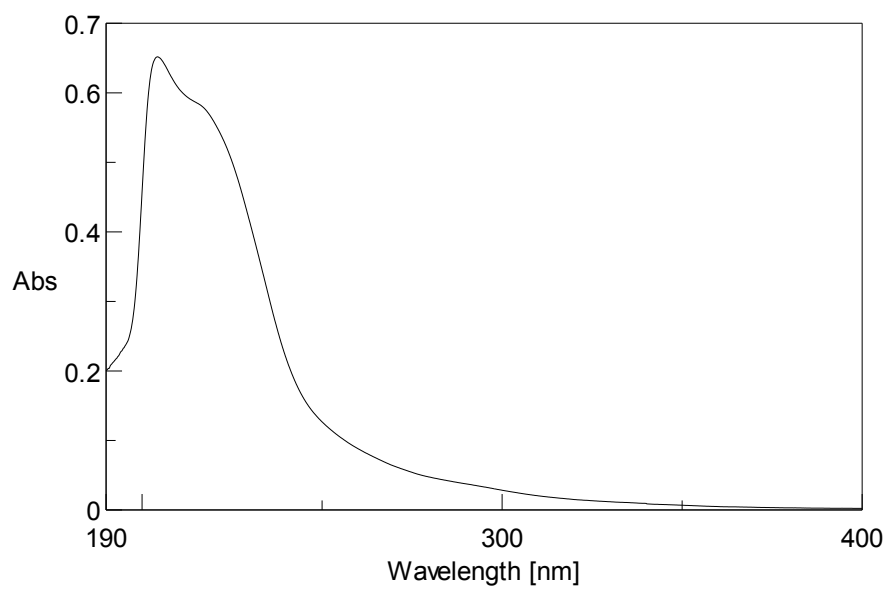



**Figure S30. The CD spectrum of belamcanolide A (4) in MeOH**

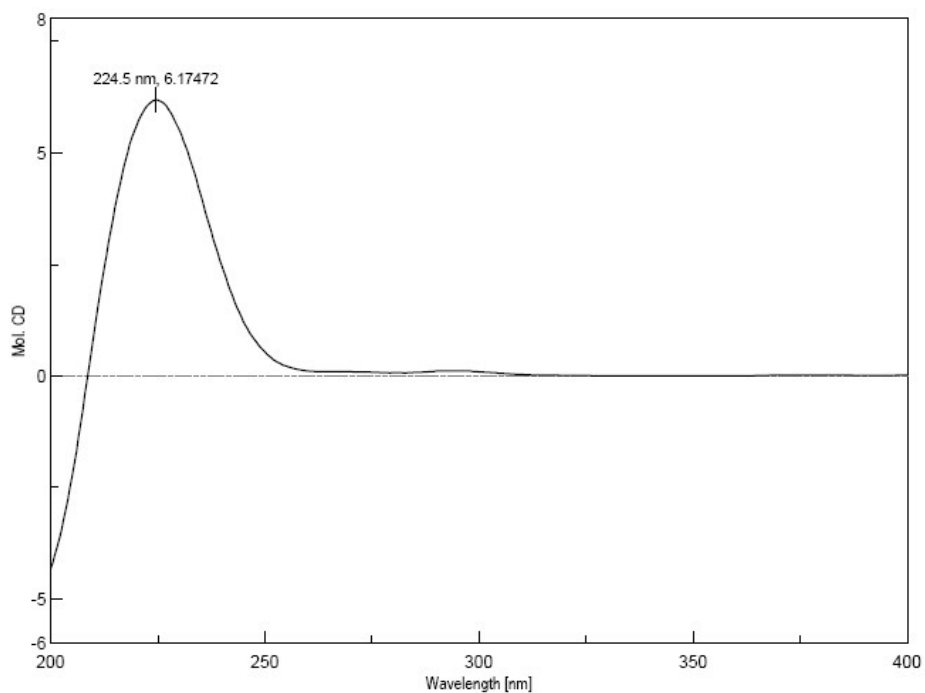

[Measurement Information]

Instrument Name IMM-CD  
Model Name J-815  
Serial No. A024461168

Accessory Standard  
Accessory S/N A024461168  
Cell Length 0.1 mm

Measurement date 2016/10/20 8:46

Photometric Mode CD, HT, Abs  
Measure Range 400 - 200 nm  
Data pitch 0.5 nm  
Sensitivity Standard  
D.I.T. 1 sec  
Bandwidth 2.00 nm  
Start Mode Immediately  
Scanning Speed 100 nm/min  
Baseline Correction Baseline  
Shutter Control Auto  
CD Detector PMT  
PMT Voltage Auto  
Accumulations 2  
Solvent MEOH  
Concentration 0.55 (w/v)%

BC-26-1-1-s-m.jws

Figure S31. The IR spectrum of belamcanolide A (4)

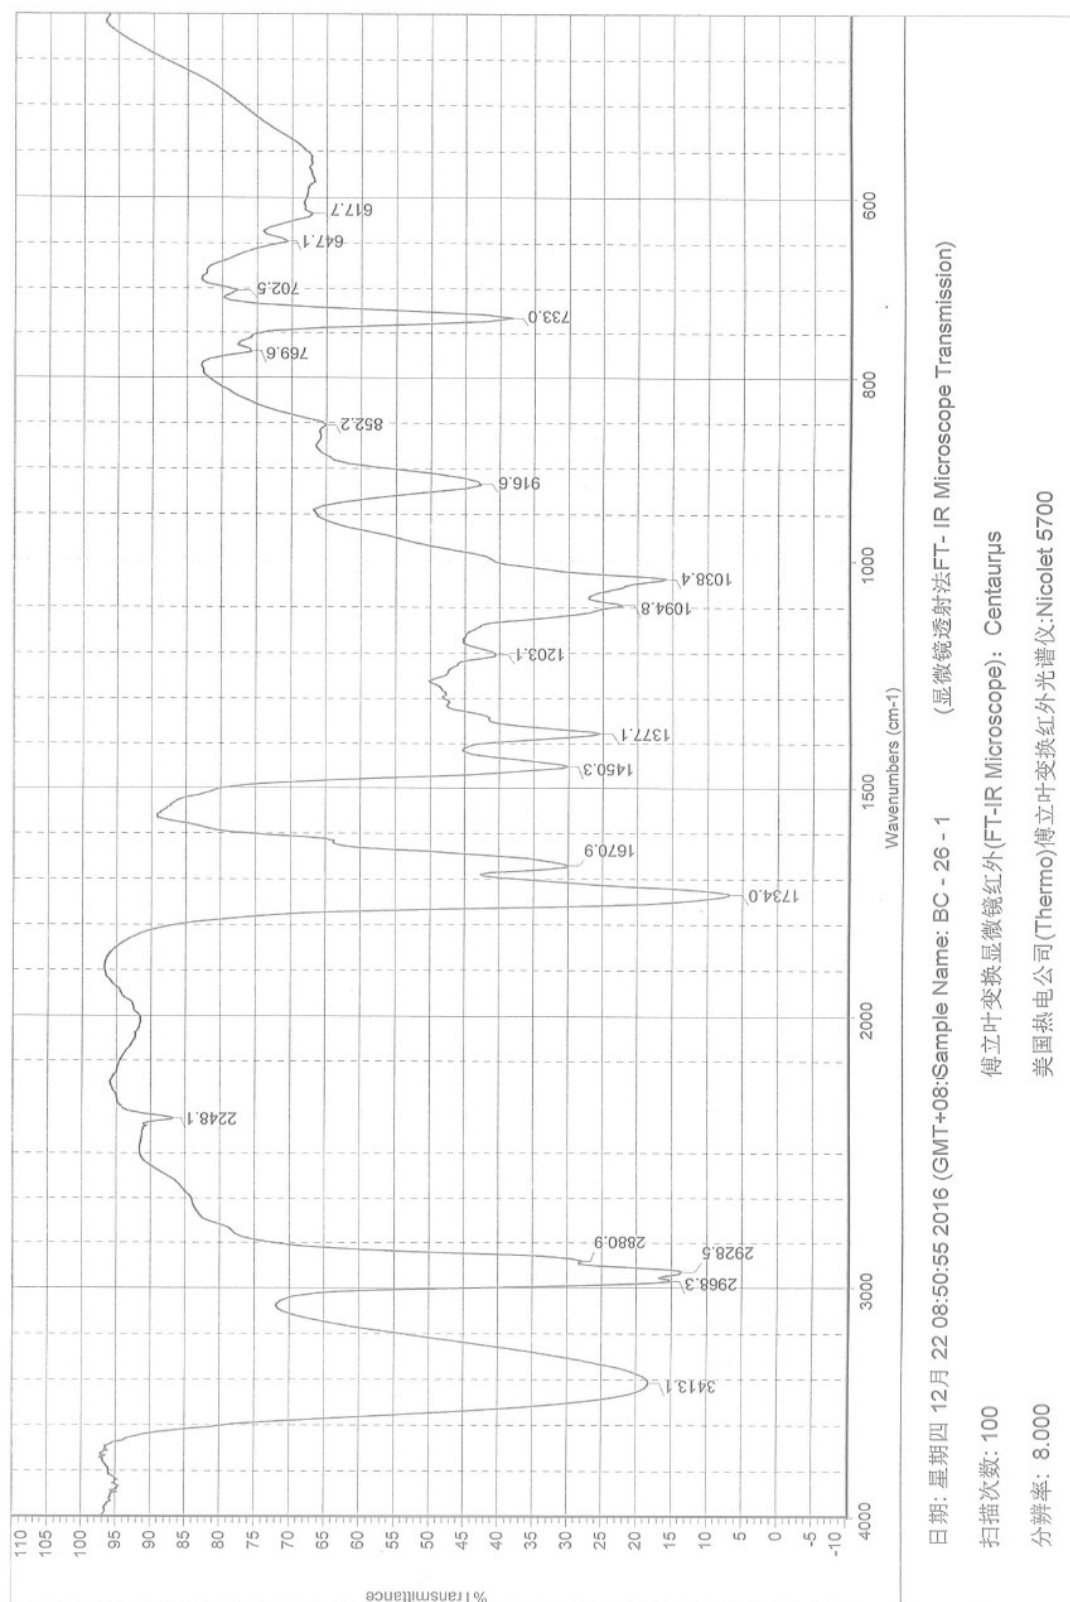

**Figure S32. The HRESI spectrum of belamcanolide A (4)**

BC-26-1 #1502 RT: 4.63 AV: 1 NL: 1.92E6  
 T: FTMS + c ESI Full ms [100.00-1000.00]

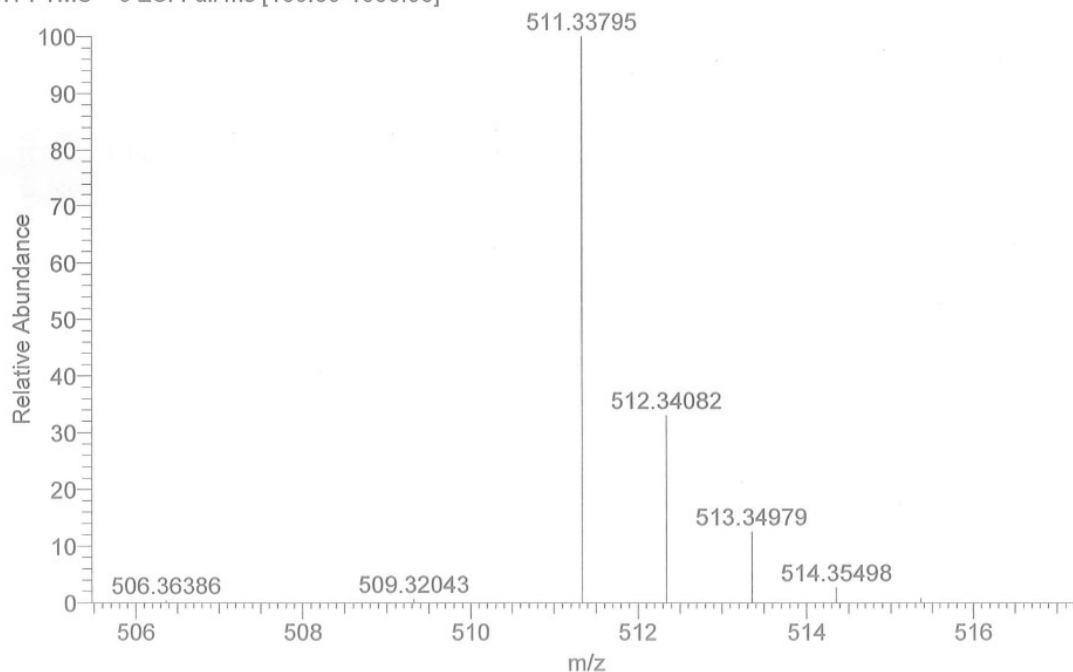

Elemental composition search on mass 511.34

m/z= 506.34-516.34

| m/z       | Theo. Mass | Delta (ppm) | RDB equiv. | Composition                                                     |
|-----------|------------|-------------|------------|-----------------------------------------------------------------|
| 511.33795 | 511.33940  | -2.83       | 6.5        | C <sub>30</sub> H <sub>48</sub> O <sub>5</sub> Na               |
|           | 511.32886  | 17.77       | 4.5        | C <sub>30</sub> H <sub>50</sub> OKNa <sub>2</sub>               |
|           | 511.34984  | -23.26      | 4.5        | C <sub>30</sub> H <sub>50</sub> O <sub>2</sub> Na <sub>3</sub>  |
|           | 511.31842  | 38.20       | 6.5        | C <sub>30</sub> H <sub>48</sub> O <sub>4</sub> K                |
|           | 511.28992  | 93.93       | 7.5        | C <sub>30</sub> H <sub>43</sub> ONa <sub>4</sub>                |
|           | 511.27948  | 114.36      | 9.5        | C <sub>30</sub> H <sub>41</sub> O <sub>4</sub> Na <sub>2</sub>  |
|           | 511.25850  | 155.38      | 9.5        | C <sub>30</sub> H <sub>41</sub> O <sub>3</sub> KNa              |
|           | 511.23752  | 196.40      | 9.5        | C <sub>30</sub> H <sub>41</sub> O <sub>2</sub> K <sub>2</sub>   |
|           | 511.21956  | 231.54      | 12.5       | C <sub>30</sub> H <sub>34</sub> O <sub>3</sub> Na <sub>3</sub>  |
|           | 511.19858  | 272.56      | 12.5       | C <sub>30</sub> H <sub>34</sub> O <sub>2</sub> KNa <sub>2</sub> |

Figure S33. The  $^1\text{H}$  NMR spectrum of belamcanolide A (4) in  $\text{CDCl}_3$

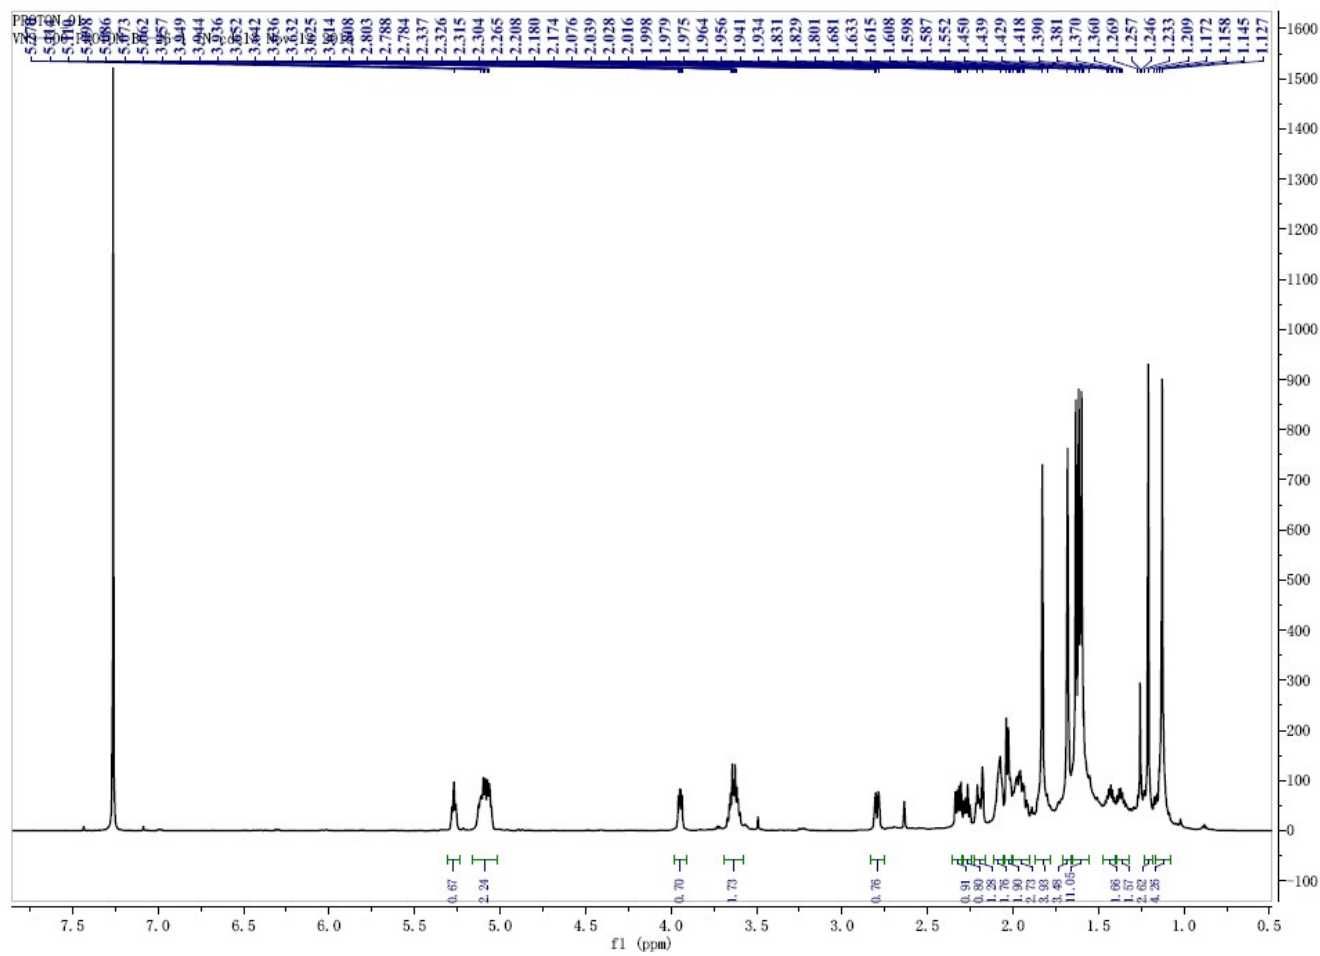

Figure S34. The  $^{13}\text{C}$  NMR spectrum of belamcanolide A (4) in  $\text{CDCl}_3$

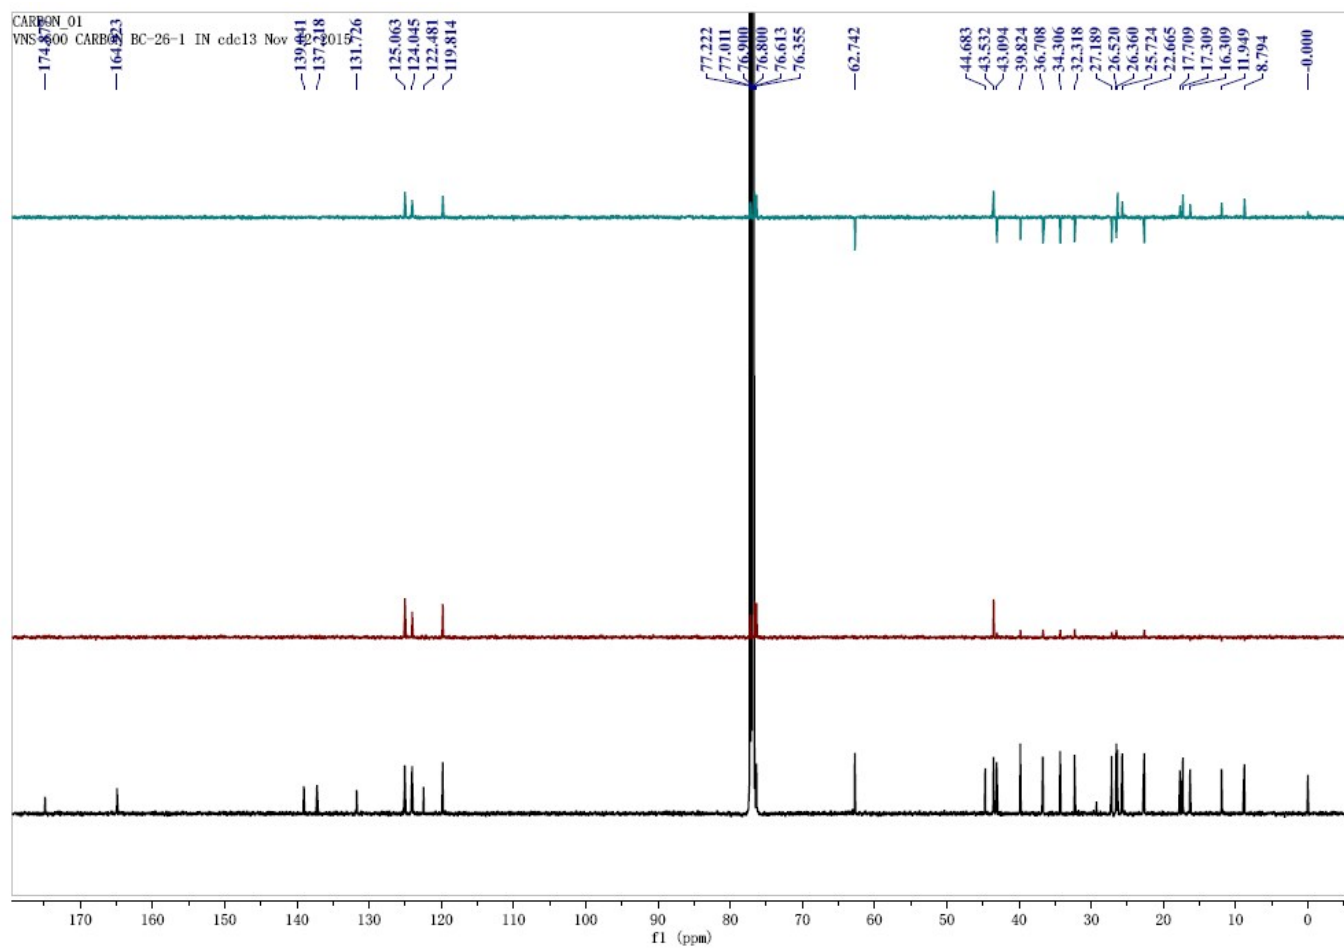

Figure S35. The COSY spectrum of belamcanolide A (4) in CDCl<sub>3</sub>

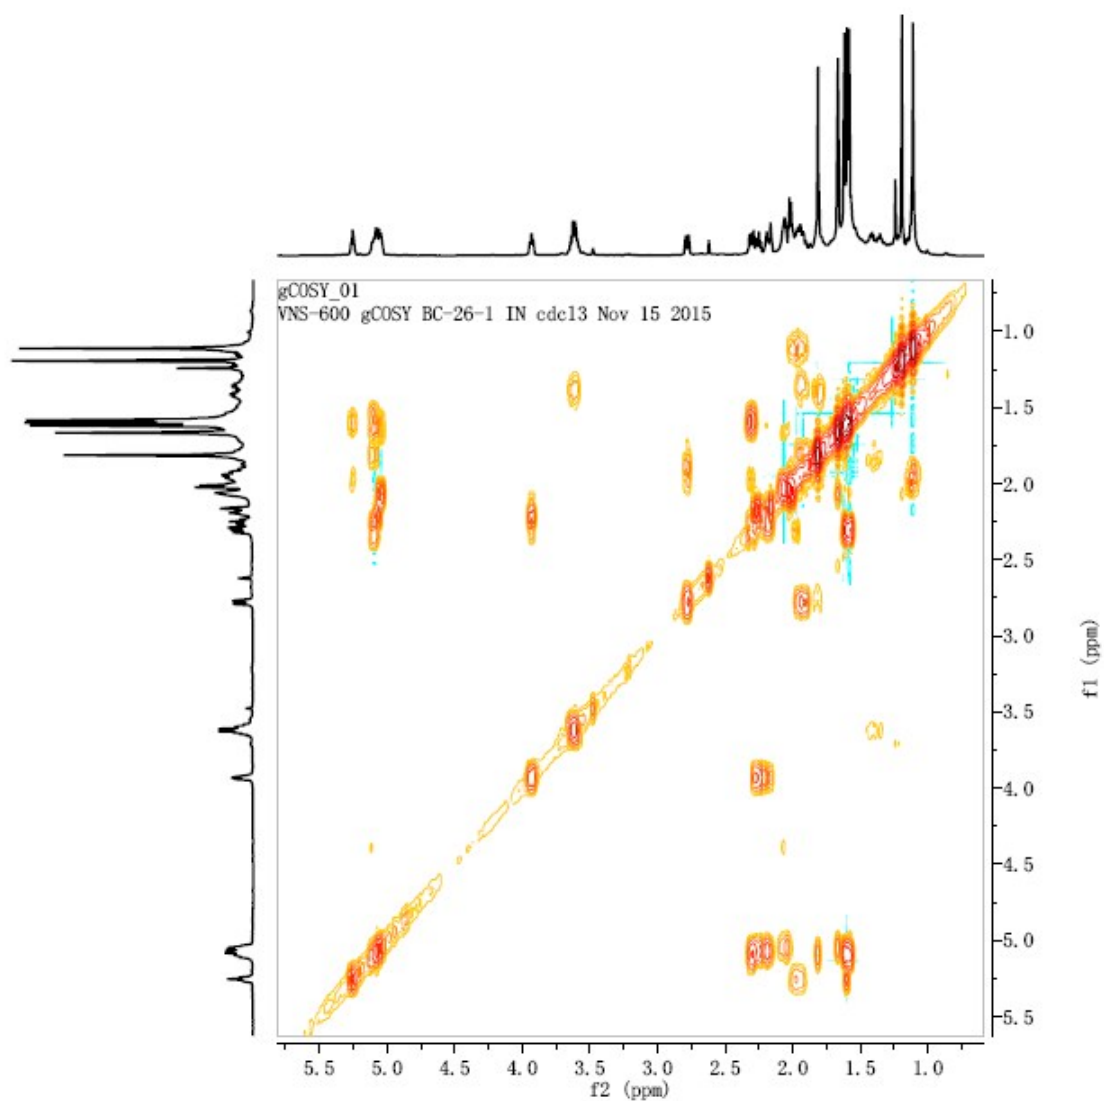

Figure S36. The HMQC spectrum of belamcanolide A (4) in CDCl<sub>3</sub>

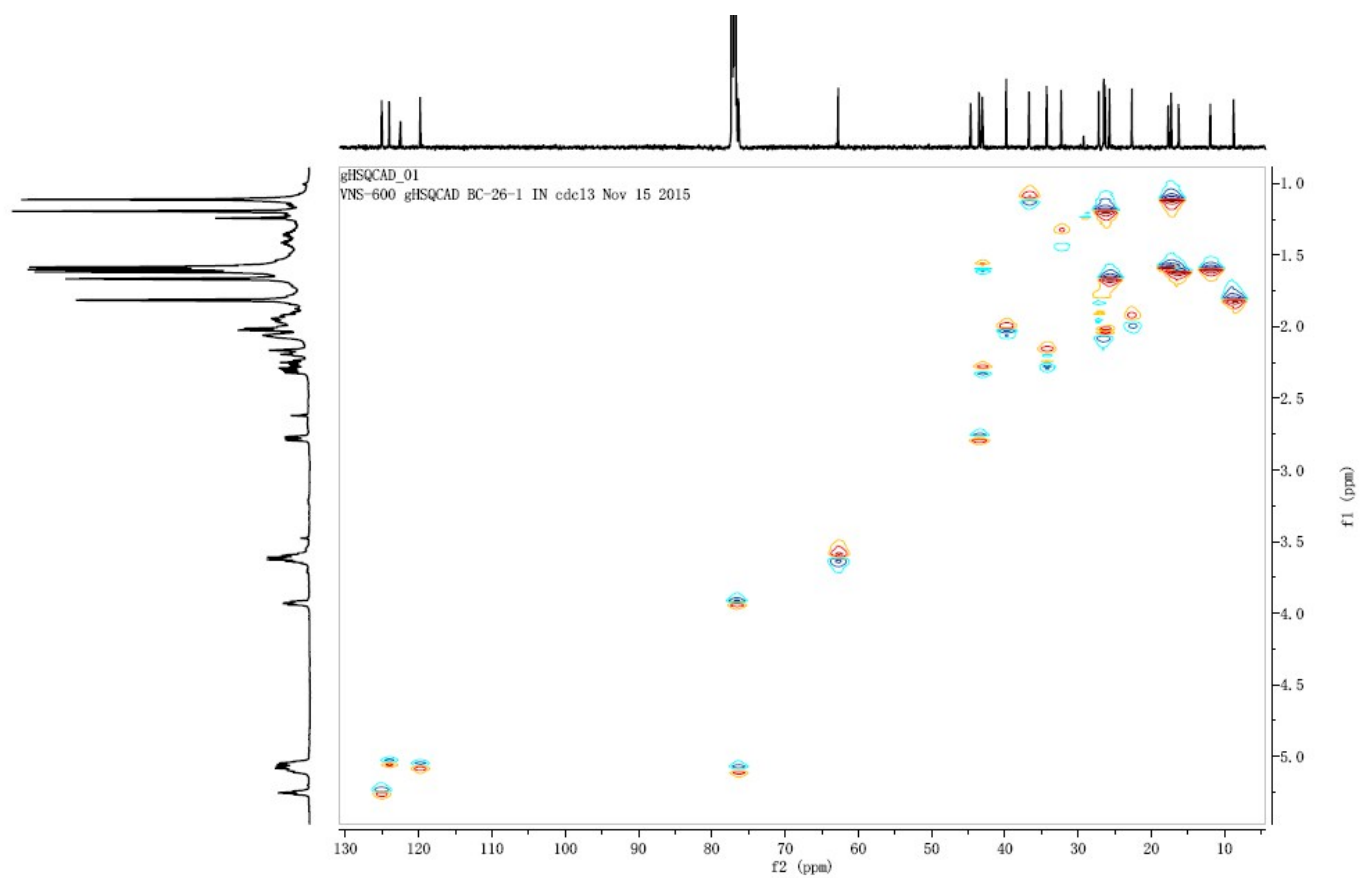

Figure S37. The HMBC spectrum of belamcanolide A (4) in CDCl<sub>3</sub>

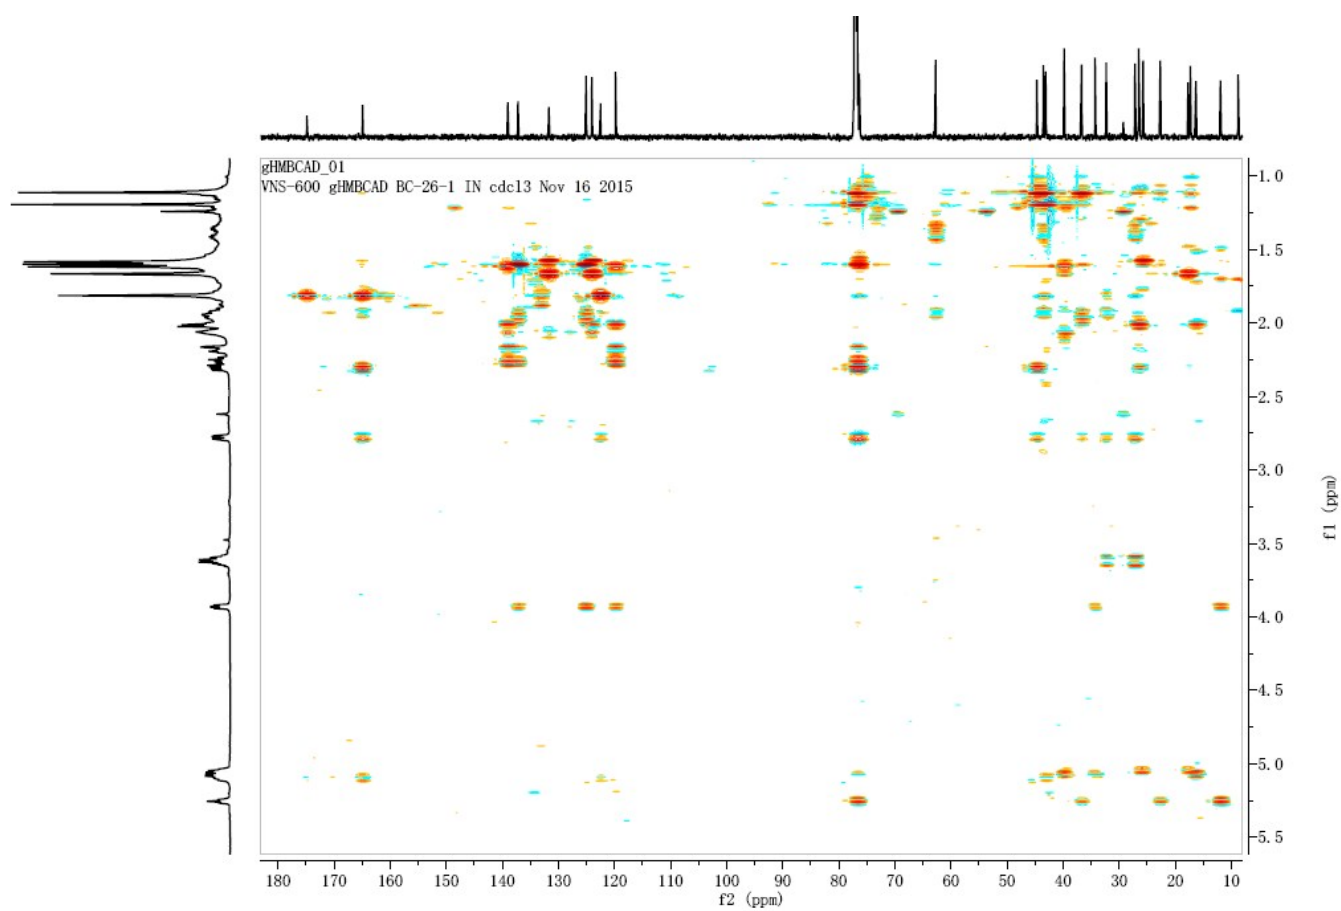



Figure S38. The HMBC spectrum of belamcanolide A (4) in CDCl<sub>3</sub>

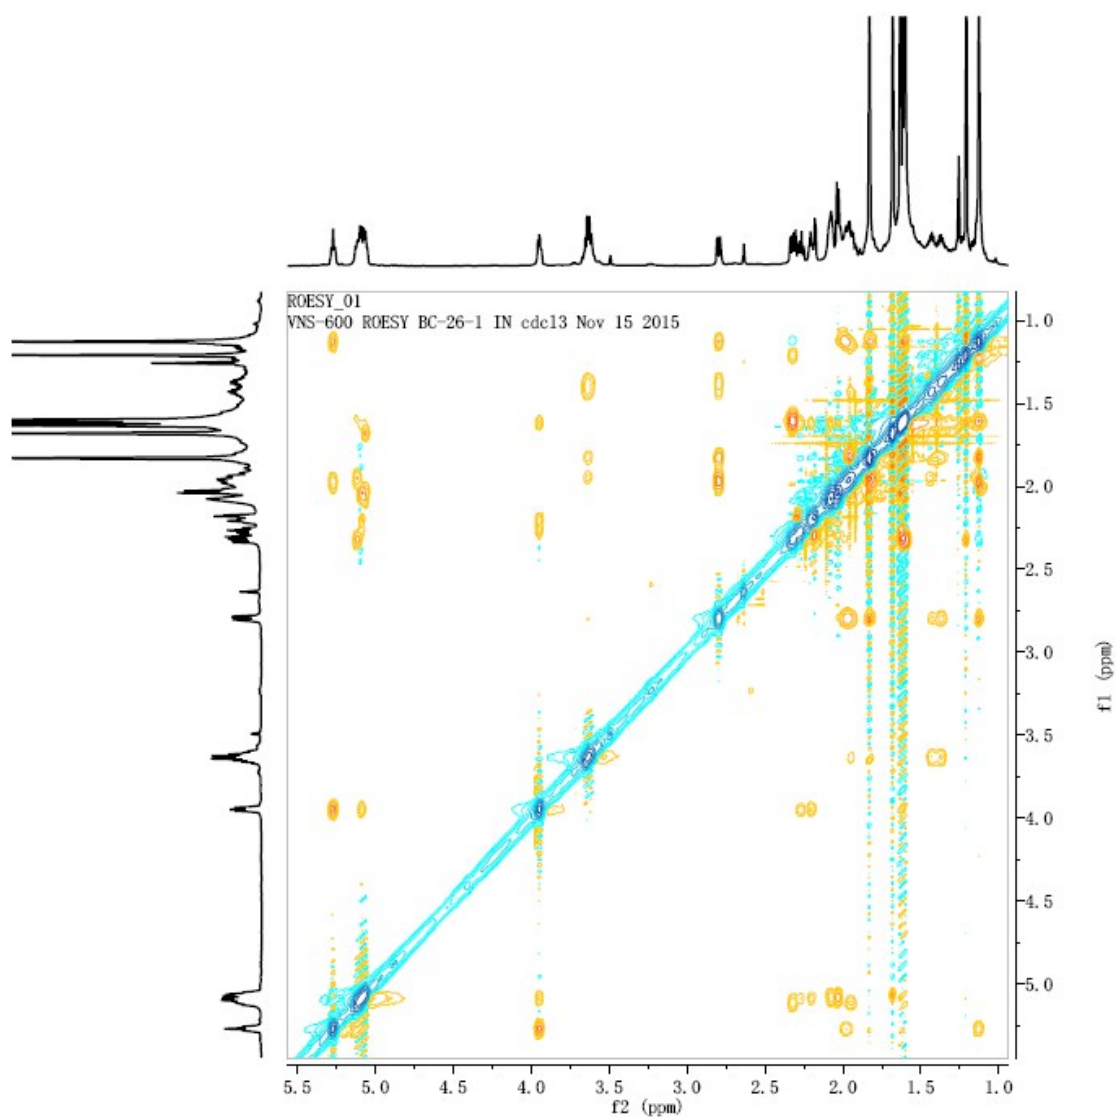

**Figure S39. The UV spectrum of belamcanoxide A (5)**

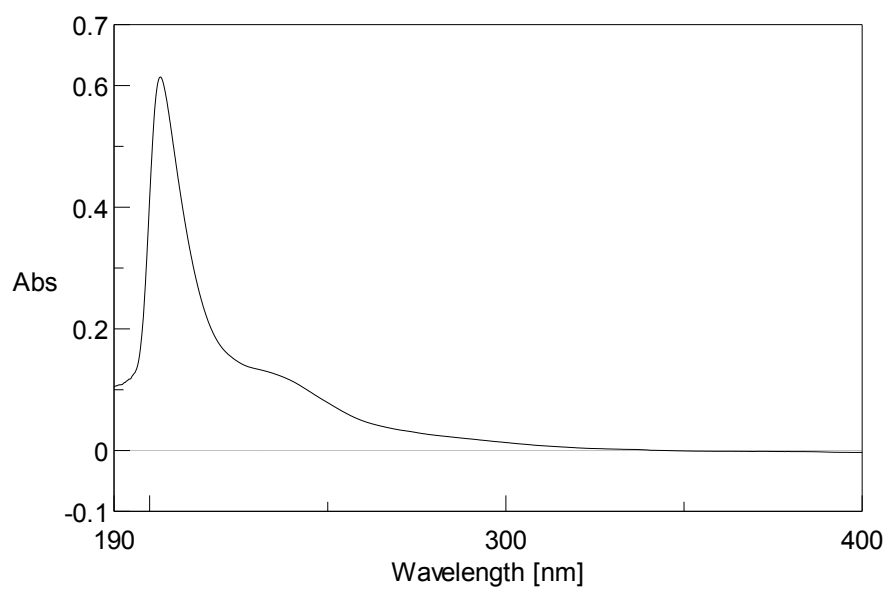

**Figure S40. The CD spectrum of belamcanoxide A (5)**

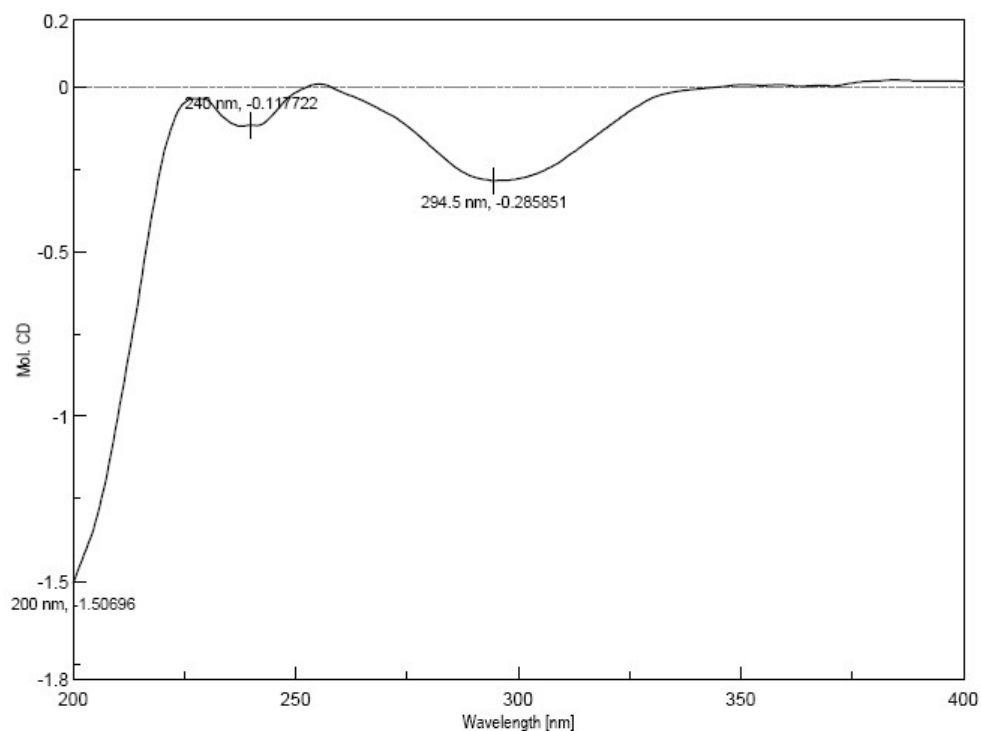

[Measurement Information]

Instrument Name IMM-CD  
Model Name J-815  
Serial No. A024461168

Accessory Standard  
Accessory S/N A024461168  
Cell Length 0.1 mm

Measurement date 2016/10/21 15:34

Photometric Mode CD, HT, Abs  
Measure Range 400 - 200 nm  
Data pitch 0.5 nm  
Sensitivity Standard  
D.I.T. 1 sec  
Bandwidth 2.00 nm  
Start Mode Immediately  
Scanning Speed 100 nm/min  
Baseline Correction Baseline  
Shutter Control Auto  
CD Detector PMT  
PMT Voltage Auto  
Accumulations 2  
Solvent MEOH  
Concentration 0.9 (w/v)%

BC-36-2-3-s-m.jws

Figure S41. The IR spectrum of belamcanoxide A (5)

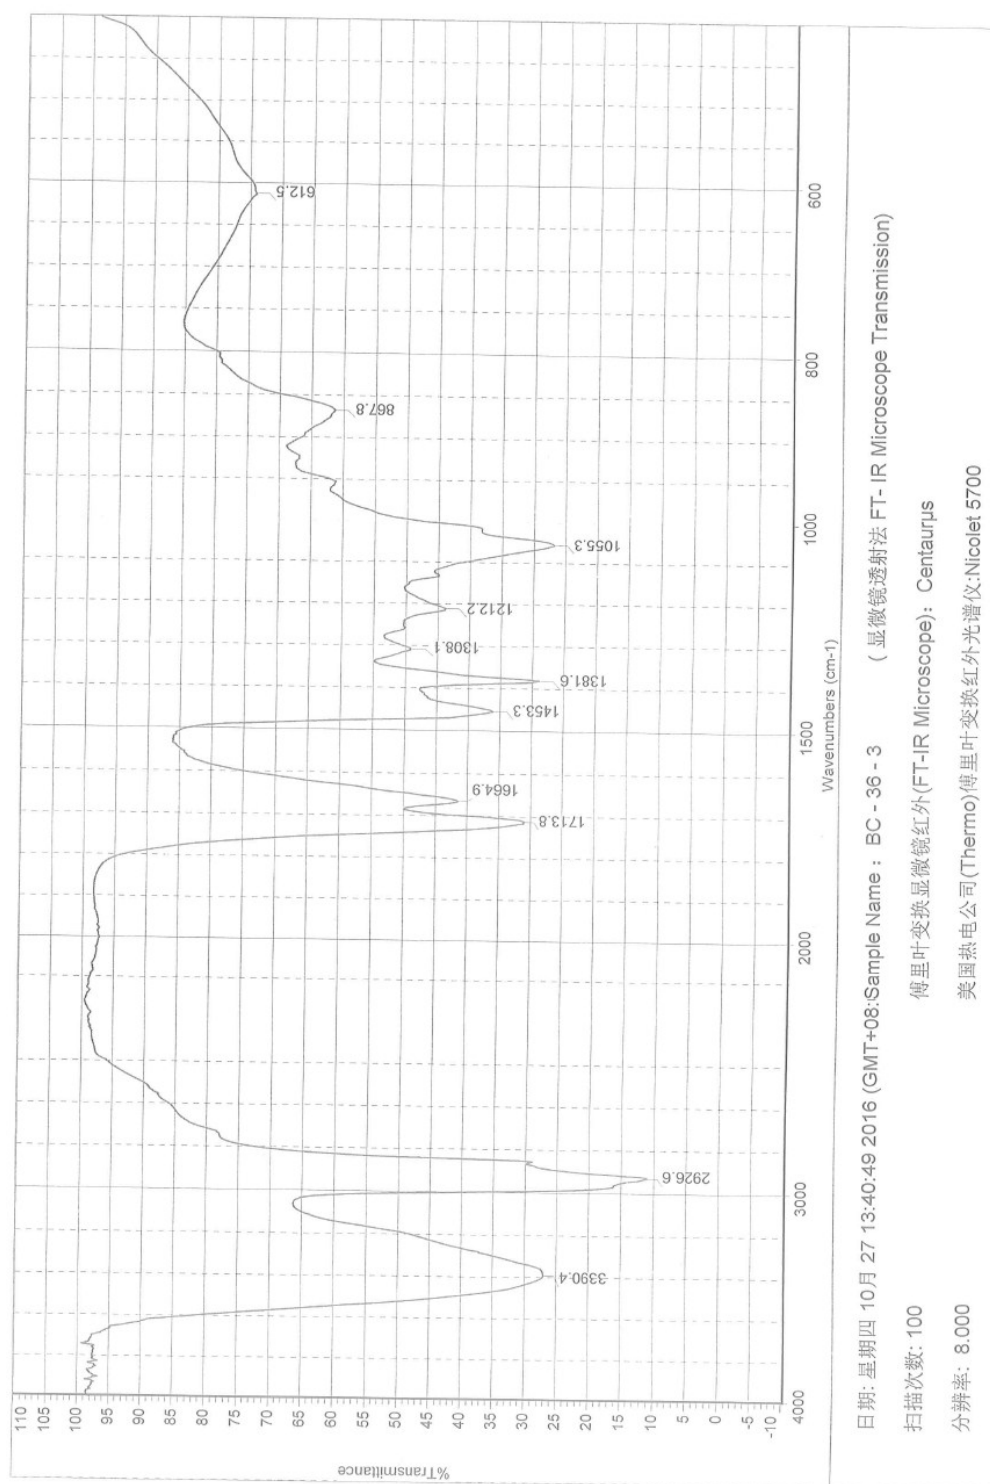

**Figure S42. The HRESI spectrum of belamcanoxide A (5)**

BC-36-2\_161014151703 #1659 RT: 5.51 AV: 1 NL: 3.21E6  
 T: FTMS + c ESI Full ms [100.00-1000.00]

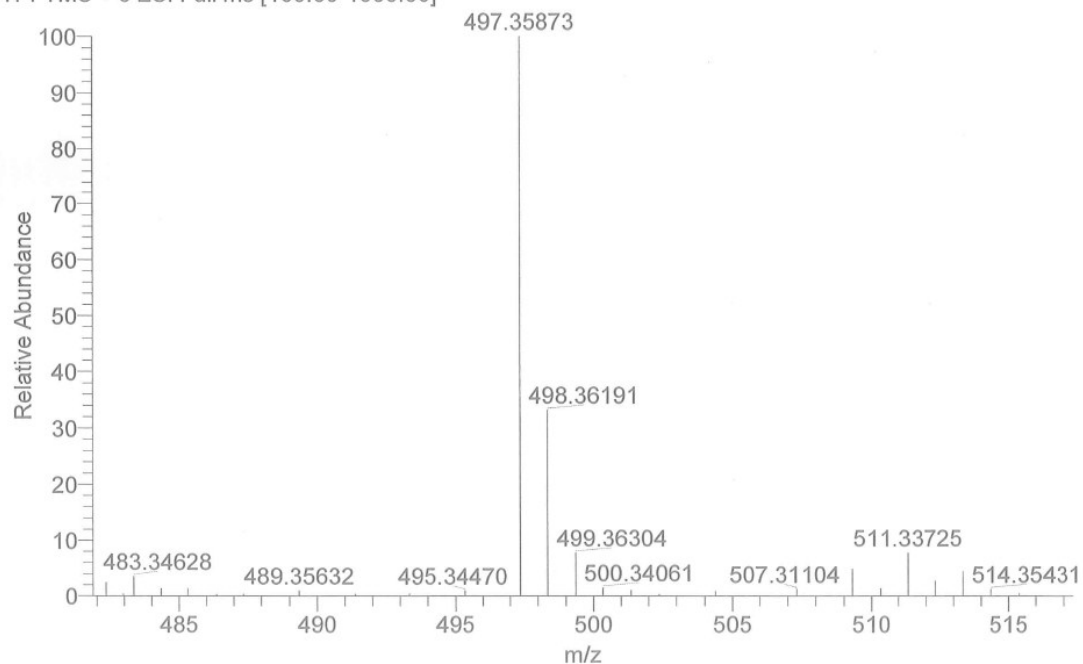

Elemental composition search on mass 497.36

m/z= 492.36-502.36

| m/z       | Theo. Mass | Delta (ppm) | RDB equiv. | Composition                                       |
|-----------|------------|-------------|------------|---------------------------------------------------|
| 497.35873 | 497.36013  | -2.82       | 5.5        | C <sub>30</sub> H <sub>50</sub> O <sub>4</sub> Na |
|           | 497.36254  | -7.65       | 8.5        | C <sub>32</sub> H <sub>49</sub> O <sub>4</sub>    |
|           | 497.37539  | -33.49      | 9.5        | C <sub>34</sub> H <sub>50</sub> O <sub>4</sub> Na |
|           | 497.34141  | 34.83       | 13.5       | C <sub>35</sub> H <sub>45</sub> O <sub>2</sub>    |
|           | 497.37779  | -38.33      | 12.5       | C <sub>36</sub> H <sub>49</sub> O                 |

Figure S43. The  $^1\text{H}$  NMR spectrum of belamcanoxide A (5)

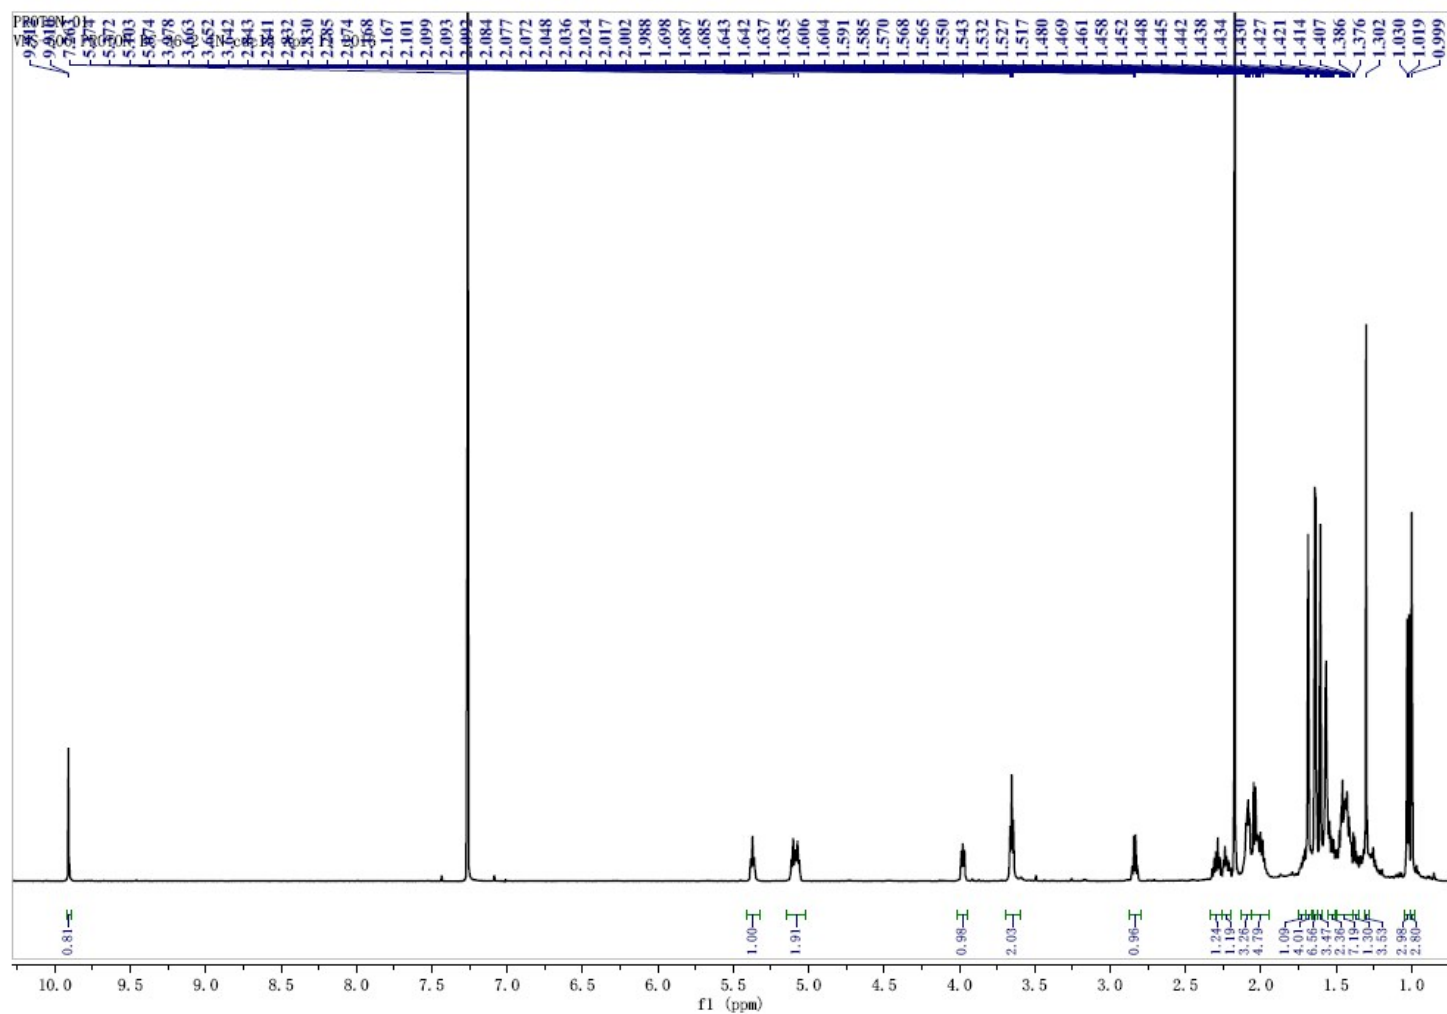

Figure S44. The  $^{13}\text{C}$  NMR spectrum of belamcanoxide A (5)

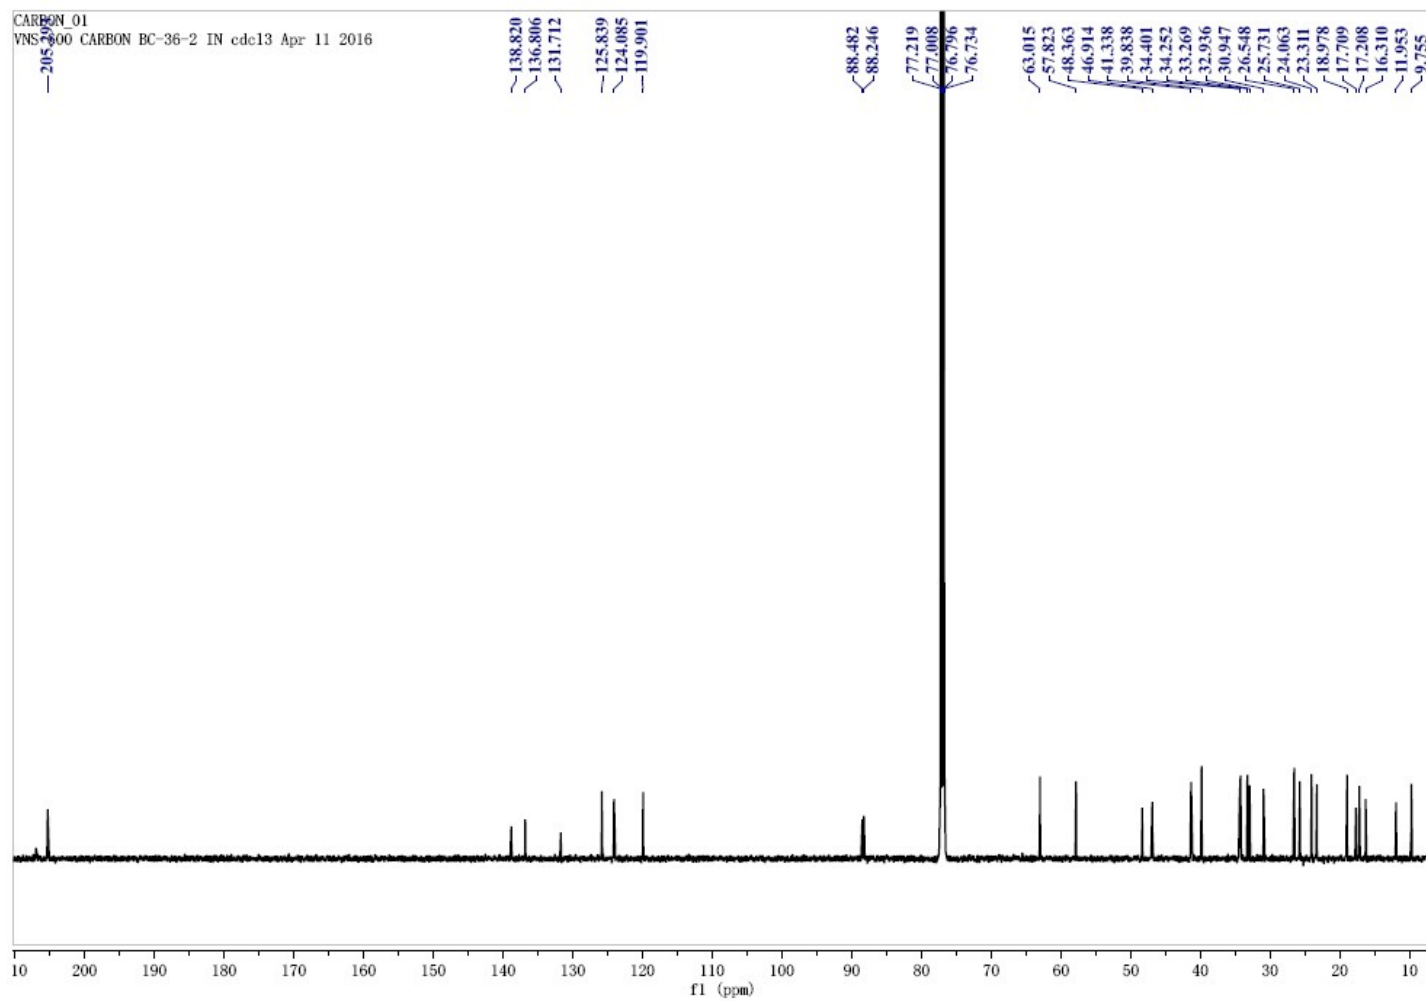

Figure S45. The DEPT NMR spectrum of belamcanoxide A (5)

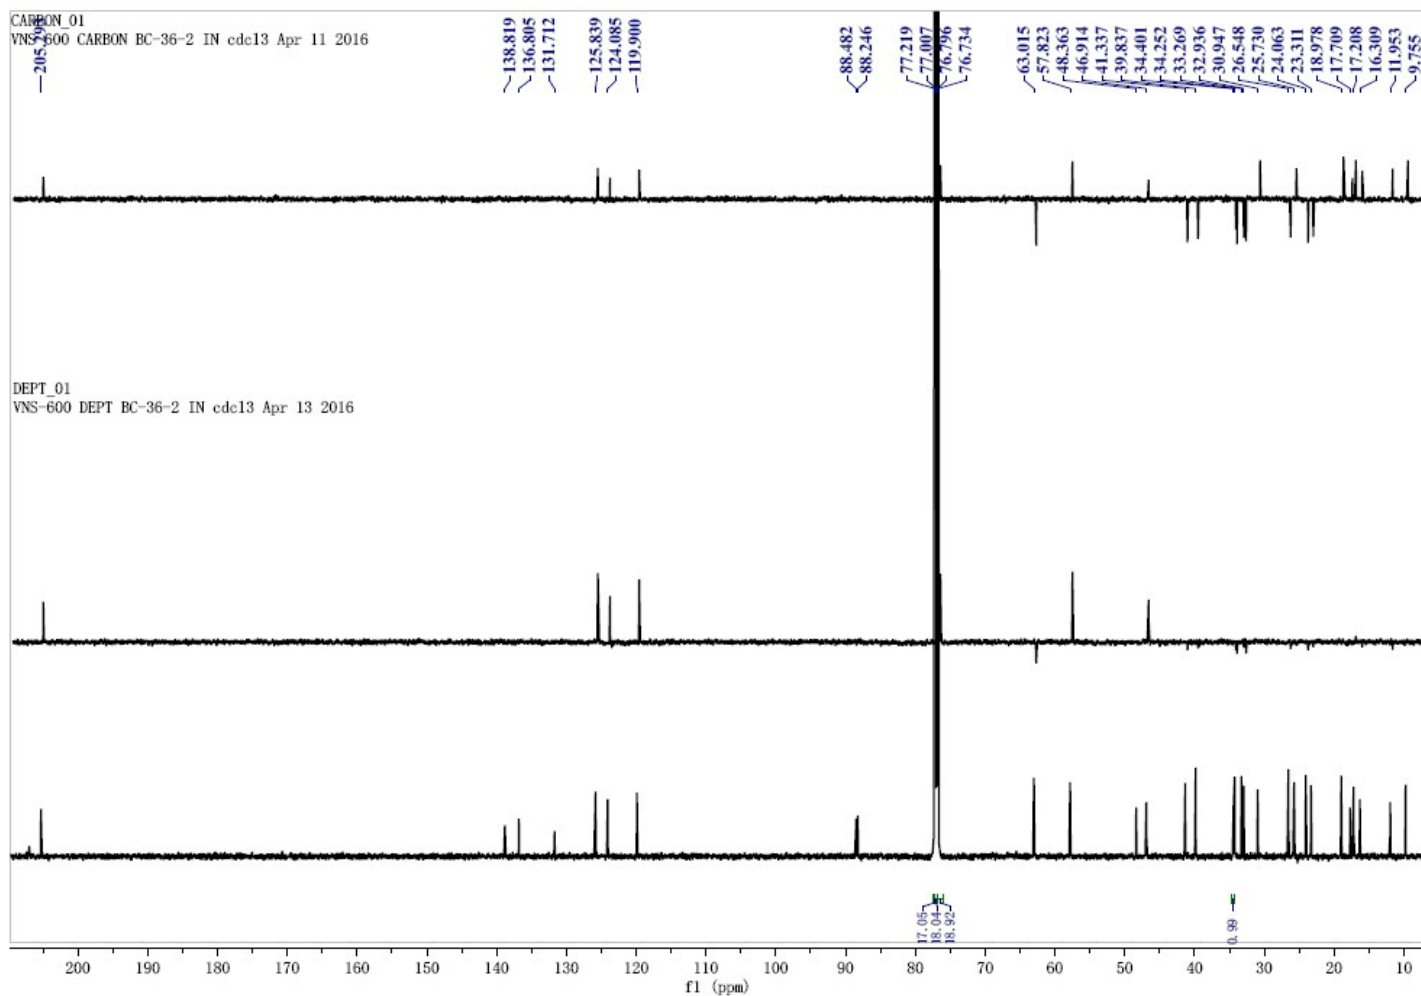



Figure S46. The HMQC spectrum of belamcanoxide A (5)

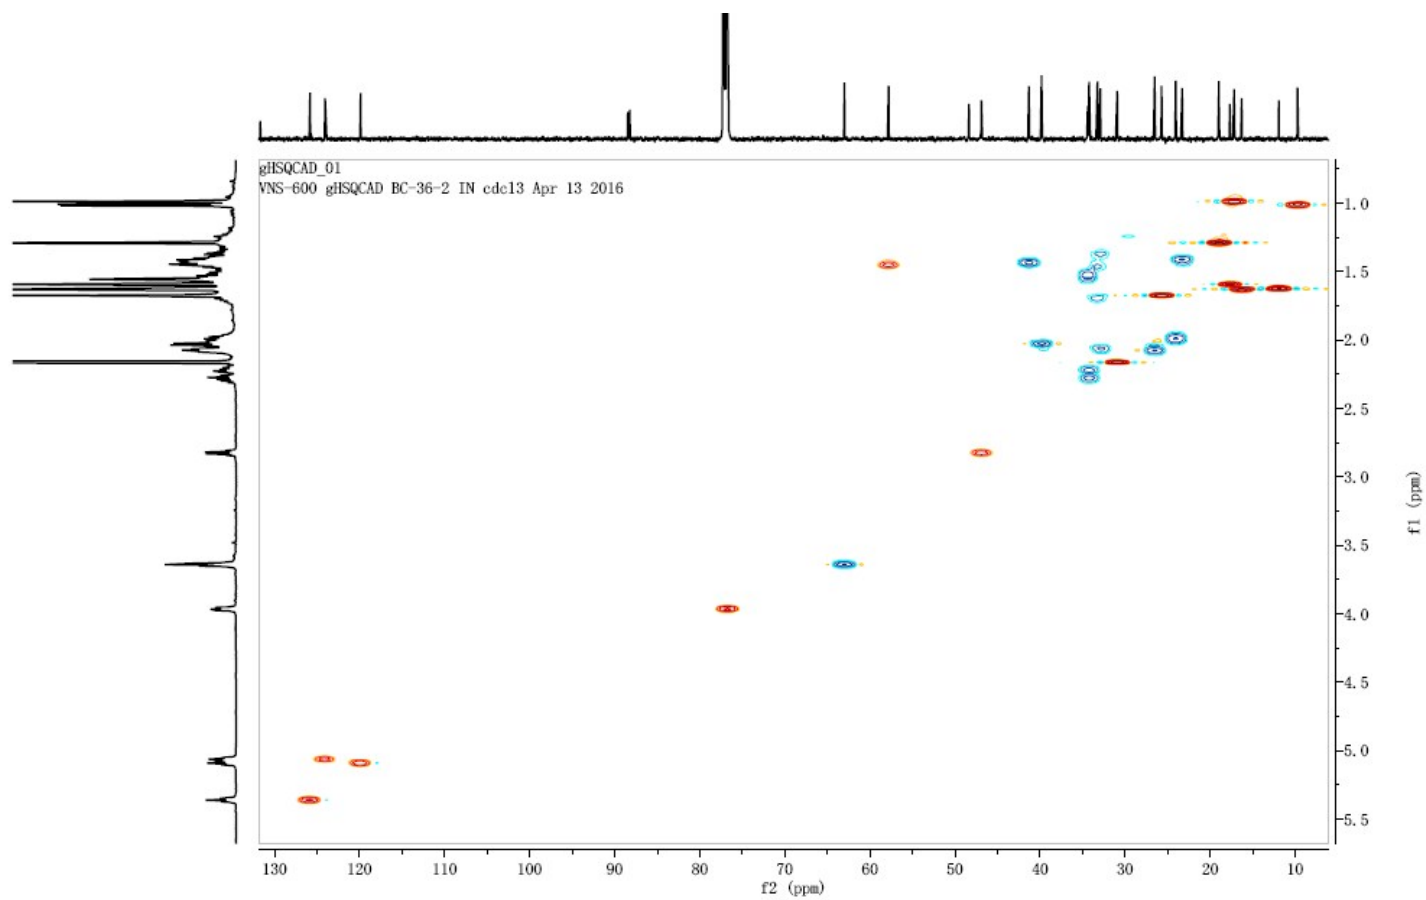

### S47. The HMBC spectrum of belamcanoxide A (5)

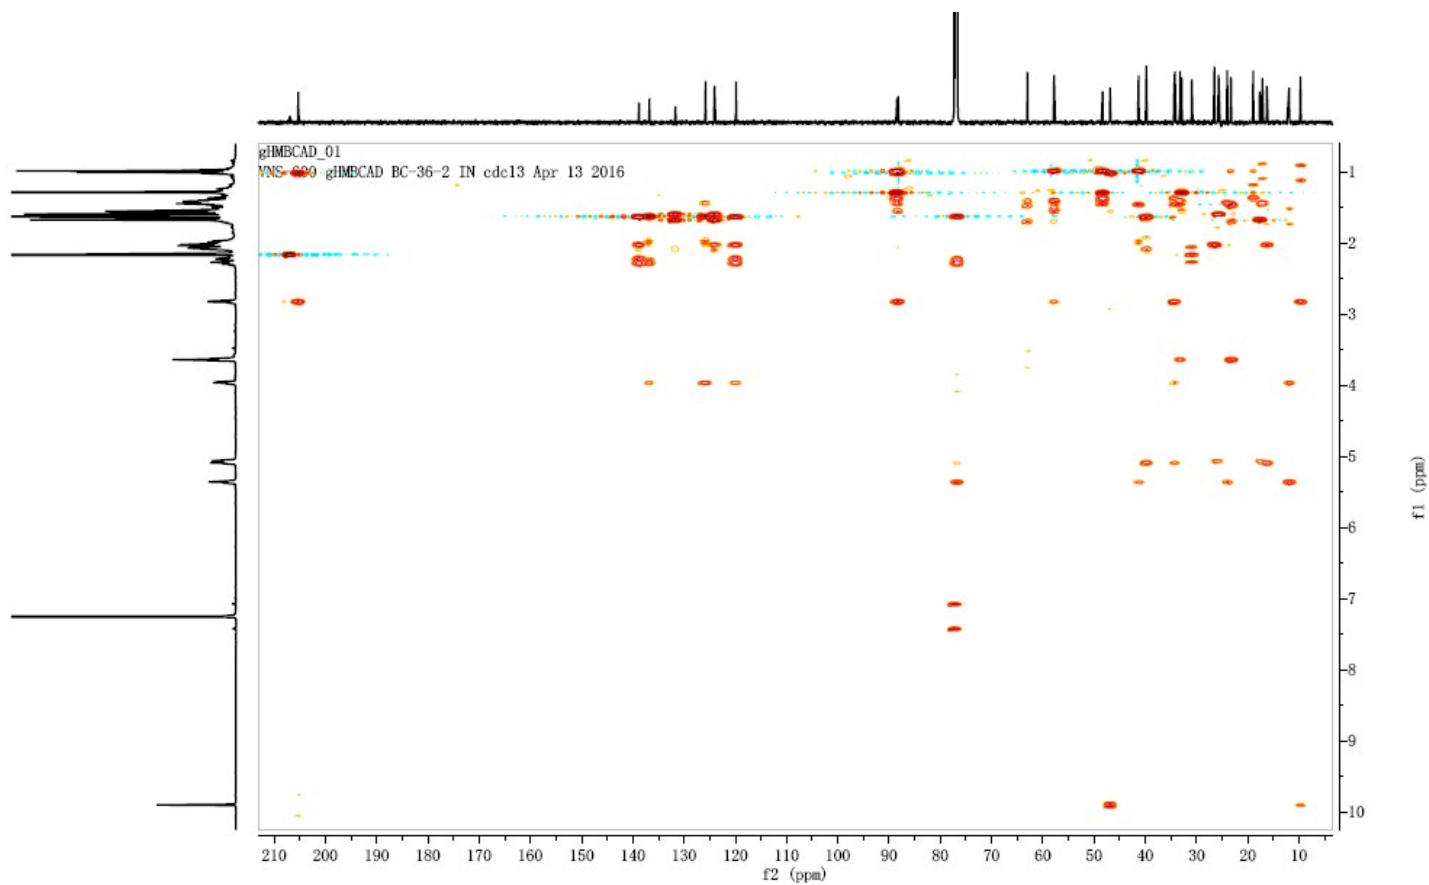

S48. The ROESY spectrum of belamcanoxide A (5)

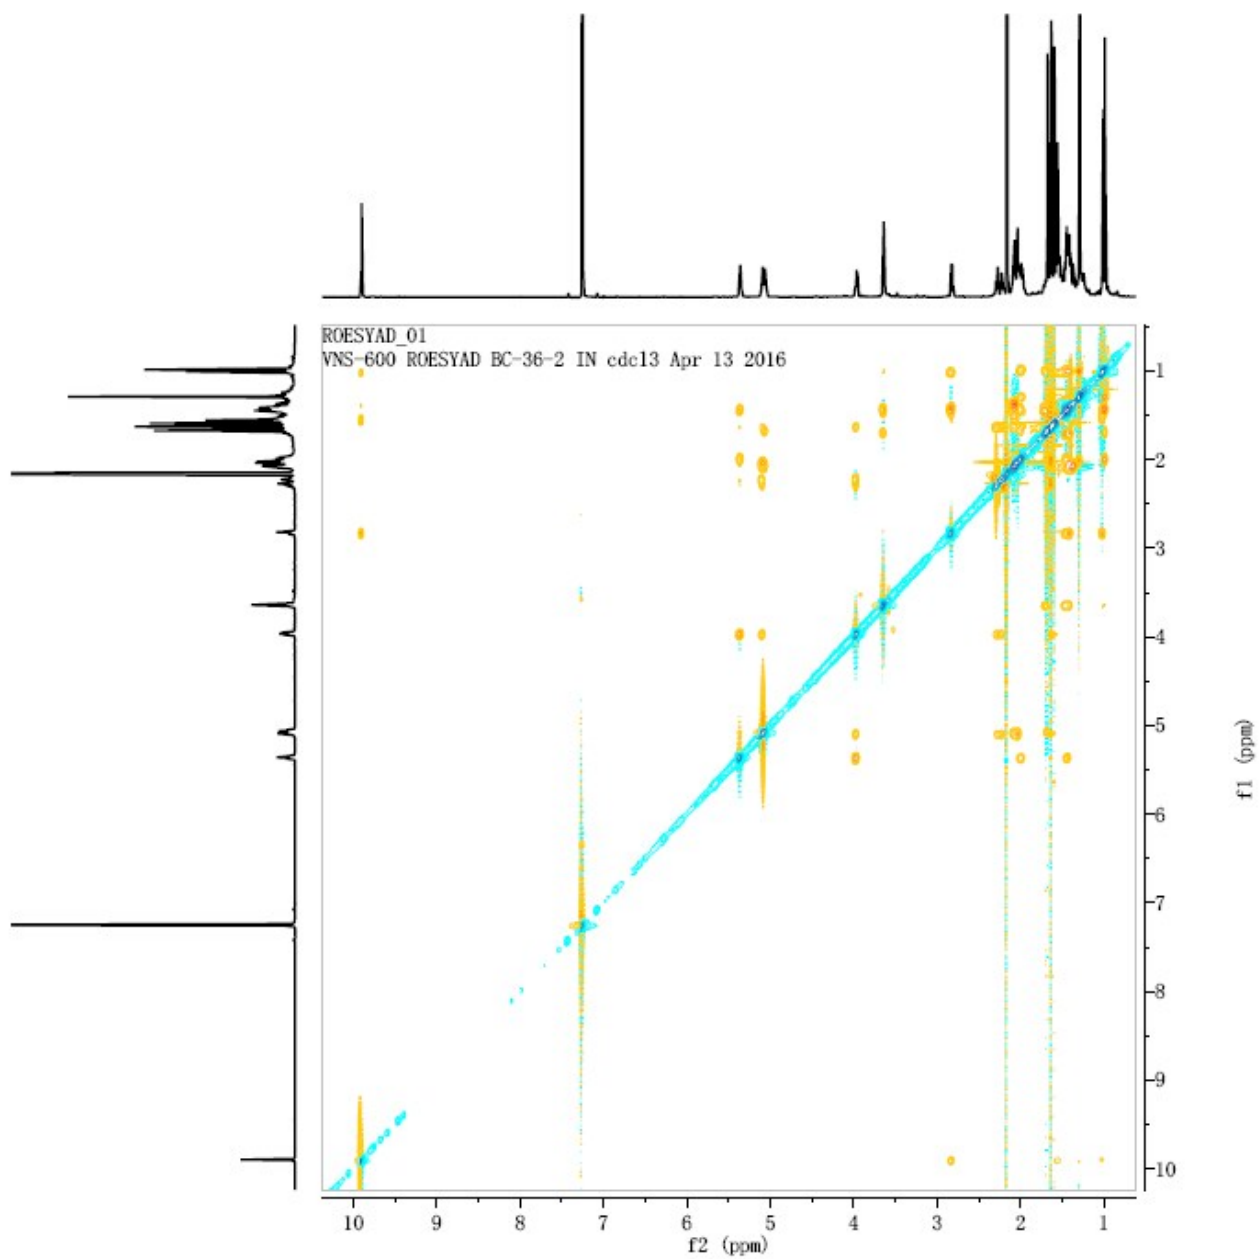

Supplement: c7ra00614d1.pdf [file c7ra00614d1.pdf]
